# 1 Transcriptome profiling reveals bisphenol A alternatives 2 activate estrogen receptor alpha in human breast cancer cells

3 Robin Mesnage<sup>1</sup>, Alexia Phedonos<sup>1</sup>, Matthew Arno<sup>2</sup>, Sucharitha Balu<sup>2</sup>, J.  
4 Christopher Corton<sup>3</sup>, and Michael N Antoniou<sup>1\*</sup>

5

6 <sup>1</sup> *Gene Expression and Therapy Group, King's College London, Faculty of Life Sciences &*  
7 *Medicine, Department of Medical and Molecular Genetics, 8th Floor, Tower Wing, Guy's*  
8 *Hospital, Great Maze Pond, London SE1 9RT, United Kingdom.*

9 <sup>2</sup> *Genomics Centre, King's College London, Waterloo Campus, 150 Stamford Street, London*  
10 *SE1 9NH, United Kingdom.*

11 <sup>3</sup> *Integrated Systems Toxicology Division, National Health and Environmental Effects*  
12 *Research Lab, US Environmental Protection Agency, 109 T.W. Alexander Dr MD-B143-06,*  
13 *Research Triangle Park, NC 27711. Fax: (919) 541-0694.*

14

15 \* Correspondence to: Michael N Antoniou, Gene Expression and Therapy Group, King's  
16 College London, Faculty of Life Sciences & Medicine, Department of Medical and Molecular  
17 Genetics, 8th Floor, Tower Wing, Guy's Hospital, Great Maze Pond, London SE1 9RT,  
18 United Kingdom. E-mail: [michael.antoniou@kcl.ac.uk](mailto:michael.antoniou@kcl.ac.uk)

1    **Short running title:** Bisphenol A alternatives are estrogenic

2    **Competing interests:** The authors declare they have no competing interests.

3    **Acknowledgements:** This work was funded by the Sustainable Food Alliance (USA) and  
4    Breast Cancer UK, whose support is gratefully acknowledged. This study has been  
5    subjected to review by the U.S. EPA National Health and Environmental Effects Research  
6    Laboratory and approved for publication. Approval does not signify that the contents reflect  
7    the views of the Agency, nor does mention of trade names or commercial products constitute  
8    endorsement or recommendation for use. We thank Drs. Richard Judson and Charles Wood  
9    for critical review of the manuscript and Dr. John Rooney for technical assistance.

10

# 1 Abstract

2 **Background:** Plasticizers with estrogenic activity, such as bisphenol A (BPA), have been  
3 reported to have potential adverse health effects in humans. Due to mounting evidence of  
4 these health effects and public pressure, BPA is being phased out by the plastics  
5 manufacturing industry and replaced by other bisphenol variants in “BPA-free” products.

6 **Objectives:** We have compared estrogenic activity of BPA to 6 bisphenol analogues  
7 (bisphenol S, BPS; bisphenol F, BPF; bisphenol AP, BPAP; bisphenol AF, BPAF; bisphenol  
8 Z, BPZ; bisphenol B, BPB) in three human breast cancer cell lines.

9 **Methods:** Estrogenicity was assessed by cell growth in an estrogen receptor (ER)-mediated  
10 cell proliferation assay, and by the induction of estrogen response element (ERE)-mediated  
11 transcription in a luciferase assay. Gene expression profiles were determined in MCF-7  
12 human breast cancer cells by microarray analysis and confirmed by Illumina-based RNA  
13 sequencing.

14 **Results:** All bisphenols showed estrogenic activity in promoting cell growth and inducing  
15 ERE-mediated transcription. BPAF was the most potent bisphenol, followed by BPB > BPZ ~  
16 BPA > BPF ~ BPAP > BPS. The addition of ICI 182,780 antagonized the activation of ERs  
17 by bisphenols. Data mining of ToxCast high-throughput screening assays confirms our  
18 results but also shows divergence in the sensitivities of the assays. The comparison of  
19 transcriptome profile alterations resulting from BPA alternatives with an ER $\alpha$  gene  
20 expression biomarker further indicates that all BPA alternatives act as ER $\alpha$  agonists in MCF-  
21 7 cells. These results were confirmed by RNA sequencing.

22 **Conclusion:** In conclusion, BPA alternatives are not necessarily less estrogenic in a human  
23 breast cancer cell model. Three bisphenols (BPAF, BPB, and BPZ) were more estrogenic  
24 than BPA. The relevance of human exposure to BPA alternatives in hormone-dependent  
25 breast cancer risk should be investigated.

# 1 Introduction

2 Plasticizers such as bisphenol A (BPA) have been reported to have potential adverse  
3 health effects in humans, including reproductive endocrine disorders and neurobehavioral  
4 problems (Rochester, 2013). BPA is one of the best-studied endocrine disrupting chemicals  
5 (EDCs), with more than 75 out of 91 published studies showing associations between BPA  
6 exposure and human health as of May 2013 (Rochester, 2013). The primary mode of action  
7 of BPA is the activation of estrogen receptor (ER) mediated transcription (Shioda *et al.*,  
8 2013). Biomonitoring studies suggest that the urine from a majority of individuals in  
9 industrialized countries contain measurable BPA and metabolites (Gerona *et al.*, 2016). BPA  
10 is detected in breast milk (Nakao *et al.*, 2015). A causal link between BPA and breast  
11 cancer remains equivocal because epidemiological studies have reported conflicting results  
12 (Rochester, 2013). Nonetheless, there is ample evidence from laboratory rodent and non-  
13 human primate studies that prenatal exposure to BPA may increase the propensity to  
14 develop breast cancer during adulthood (Mandrup *et al.*, 2016; Tharp *et al.*, 2012). In these  
15 studies, low-doses of BPA has been shown to affect mammary gland development by  
16 causing hyperplastic lesions in rats, which are parallel to early signs of breast neoplasia in  
17 women (Mandrup *et al.*, 2016). These findings suggests that mammary tumors provoked by  
18 BPA may be initiated in the womb, and thus more prospective studies measuring BPA in  
19 utero are needed in order to conclude there is a carcinogenic potential for humans. Due to  
20 mounting evidence of harm and public pressure, BPA is being phased out by plastics  
21 manufacturers and is being replaced by other BP variants in “BPA-free” products (Rochester  
22 and Bolden, 2015).

23 Bisphenol F (BPF), Bisphenol S (BPS), and Bisphenol AF (BPAF) are among the  
24 main substitutes of BPA in polycarbonate plastics and epoxy resins (Chen *et al.*, 2016). They  
25 are commonly found in baby feeding bottles, on thermal receipt papers, glues, dental  
26 sealants, food packaging or personal care products. There is a strong negative correlation  
27 between the levels of BPA and BPS on thermal paper, whereby the papers containing high  
28 quantities of BPS have low quantities of BPA, suggesting that BPS has in part replaced BPA  
29 in this context (Liao *et al.*, 2012). The handling of a thermal receipt paper before eating  
30 French fries is sufficient to cause a rapid increase of serum BPA levels within 30 min  
31 (Hormann *et al.*, 2014). Epidemiological data on the human body burden of different BPA  
32 alternatives is very limited, but evidence suggests that they are generally widespread. In an  
33 investigation of the presence of BPS and bisphenol F (BPF) in human urine, these  
34 compounds were found to be present in 78% and 55% of respective samples in the United  
35 States (Zhou *et al.*, 2014). Another investigation revealed that although the average urinary

concentration of BPA in 130 individuals from Saudi Arabia was 4.92 ng/mL, 7 other bisphenols were found with the total bisphenol concentration reaching 19 ng/mL (Asimakopoulos *et al.*, 2016), suggesting that BPA is only one of many BP alternatives that are found in humans.

Some of these BPA replacements are structurally related to BPA and have endocrine disrupting effects. Numerous studies have suggested that BPS and BPF have potencies similar to that of BPA resulting in endocrine disrupting effects such as uterine growth in rodents (Rochester and Bolden, 2015). A number of in vitro studies have looked at endocrine mode of action of some BPA alternatives in nuclear hormone receptor interactions (Chen *et al.*, 2016). The range of EC50 values for estrogen activity (0.02  $\mu$ M to >1000  $\mu$ M) and androgen activity (0.29  $\mu$ M to >1000  $\mu$ M) of 20 BP congeners (5 of which are being tested here) indicates remarkable differences (Kitamura *et al.*, 2005). Another study showed that 5 BPA alternatives (3 studied here) exhibited potencies within the same range as BPA on steroidogenesis, androgen receptor, aryl hydrocarbon receptor, and retinoic acid receptor activity (Rosenmai *et al.*, 2014). Some BPA alternatives have also been tested in ER high-throughput screening assays in the context of the US Environmental Protection Agency (EPA) ToxCast program and shown in some cases to have estrogen-like effects (Judson *et al.*, 2015).

Perturbation of the gene expression profile of a cell by chemicals results in unique signatures, allowing comparisons between transcriptome alterations caused by drugs and diseases to predict therapeutic and off-target effects (Iorio *et al.*, 2010). The clinical utility of gene expression profiles is exemplified by studies showing that transcriptome signatures may affect clinical decision-making in breast cancer (Rhodes and Chinnaiyan, 2005). Gene expression have been shown to be a more powerful predictor of breast cancer survival than standard systems based on clinical and histologic criteria (van de Vijver *et al.*, 2002). Exposure of breast cancer cells to BPA present a gene expression profile of tumor aggressiveness associated with poor clinical outcomes for breast cancer patients (Dairkee *et al.*, 2008). While ER activation drives two-thirds of breast cancer (Green and Carroll, 2007), there have been no studies aimed at elucidating transcriptome alterations underlying estrogenic effects of a broad range of BPA alternatives to which human populations are exposed. In order to address this deficiency, we studied alterations in gene expression profiles of estrogen-dependent MCF-7 human breast cancer cells caused by BPA and 6 alternatives (Figure 1) using Affymetrix microarray and Illumina RNA sequencing platforms. These BPA alternatives are detected in different categories of food items (Liao and Kannan, 2013) and are found in human biological fluids (Asimakopoulos *et al.*, 2016). The transcriptome signatures obtained were compared to a gene expression biomarker, which

has been demonstrated to accurately predict ER modulation, including by “very weak” agonists (Ryan *et al.*, 2016). We also used an E-screen assay (cell proliferation in estrogen-responding cells) as well as an estrogen response element (ERE)-luciferase reporter gene assay system. Our results clearly demonstrate that all 6 BPA alternative compounds are estrogenic. Alterations of MCF-7 transcriptome profiles caused by BPA alternatives bear the signature of ER activation with three bisphenols (BPAF, BPB, BPZ) having more estrogenic potency than BPA.

## Methods

### Cell culture and treatments

All reagents and chemicals, unless otherwise specified, were of analytical grade and purchased from Sigma-Aldrich (UK). MCF-7, MDA-MB-231 and T47D human breast cancer cell lines were a gift from Prof. Joy Burchell (Research Oncology Department, King’s College London, UK). The T47D-KBluc cells were purchased from the American Type Culture Collection (ATCC, Teddington, UK) and harbour a stably integrated copy of a luciferase reporter gene under control of a promoter containing EREs. All cells were grown at 37°C (5% CO<sub>2</sub>) in 75 cm<sup>2</sup> flasks (Corning, Tewksbury, USA) in a maintenance medium composed of phenol red free DMEM (Life Technologies, Warrington, UK), 10% fetal bovine serum (FBS; GE Healthcare Life Sciences, Buckinghamshire, UK), 2mM glutamine (GE Healthcare Life Sciences) and 10 µg/ml penicillin/streptomycin (Life Technologies). Test substances were diluted in 100% ethanol to prepare stock solutions. All treatments were prepared in a test medium containing phenol red free DMEM, 5% charcoal stripped FBS (Life Technologies), 2mM glutamine (GE Healthcare Life Sciences) and 10 µg/ml penicillin/streptomycin (Life Technologies). The solvent control contained 0.1% (v/v) absolute ethanol diluted in test medium. Cells were detached from the flask substrate using 0.05% trypsin EDTA (Life Technologies) and counted using a haemocytometer prior to seeding. After a 24 h recovery period in DMEM maintenance medium tests were applied.

### E-Screen assay

The E-screen assay allows the determination of estrogenic effects by determining estrogen receptor-mediated cell proliferation in hormone-responsive cells. This assay was performed as originally described (Soto *et al.*, 1995), except that the bioassay was terminated using a MTT assay, indirectly measuring cell number by testing the activity of mitochondrial succinate dehydrogenase, in order to assess cell proliferation. Briefly, cells

were seeded into 48-well plates (Dutscher Scientific, Brentwood, UK) at a density of 20,000 cells per well in 250 µl maintenance medium. Following a 24-hour incubation to allow cell attachment, medium was changed to include various concentrations of treatment substances. The test medium was refreshed after 3 days. After another 3 day incubation, an MTT assay was performed as follows. Cells were incubated with 250 µl of MTT solution (1 mg/ml) for 2 hours and the test terminated by lysing the cells with dimethyl sulfoxide (DMSO). The optical density of the cell lysate was measured at 570 nm using the SPECTROstar Nano plate reader (BMG Labtech, Ortenberg, Germany). The cell proliferative effect was expressed as a percentage of the control, untreated samples.

### **ERE-mediated luciferase reporter gene assay**

The ERE-mediated transcription of a luciferase reporter gene (3xERE) was determined in the T47D-KBluc cells (Wilson *et al.*, 2004) using the Steady-Glo® luciferase assay system following the manufacturer's instructions (Promega, Southampton, UK). The T47D-KBluc cells were seeded in white 96 well plates (Greiner Bio-One, Germany) at a density of 20,000 cells per well in 50 µl of maintenance medium and allowed to attach overnight. An initial 24 h incubation was performed in the absence of test substances to purge cells of hormone residues in order to improve estrogen deprivation. Test substances were added and plates were incubated for another 24 hours before the addition of 50 µl Steady-Glo® luciferase reagent. The plates were left to stand for 10 minutes in the dark at room temperature to allow cell lysis and establishment of the luciferase reaction. Luminescence was measured using the Orion II microplate luminometer (Berthold Detection Systems, Bad Wildbad, Germany). Estrogen receptor modulation was confirmed by measuring the inhibitory effect of ICI 182,780 on the concentration of BPA resulting in a 20-fold increase in luciferase activity.

### **Microarray gene expression profiling**

MCF-7 cells were seeded into 96-well plates with maintenance medium at a density of 20,000 cells per well. After 24 h of steroid hormone deprivation in hormone-free medium, the cells were stimulated with test substances for 48 h in triplicate in three independent experiments. RNA extraction was performed using the Agencourt RNAdvance Cell V2 kit according to the manufacturer's instructions (Beckman Coulter Ltd, High Wycombe, UK). The samples were checked for RNA quality using the Agilent 2100 Bioanalyzer (Agilent Technologies LDA UK Limited, Stockport, UK) and quantified using the Nanodrop ND-1000 Spectrophotometer (Thermo Fisher Scientific, Wilmington, USA). The RNA integrity number (RIN) was  $9.7 \pm 0.3$ . Subsequently, triplicate samples which passed quality control

(QC) criteria were pooled appropriately such that the final input amount of each sample was 3 ng.

The gene expression profiles were determined using the Affymetrix Human Transcriptome 2.0 Array as follows. Single Primer Isothermal Amplified (SPIA) cDNA was generated using the Ovation Pico WTA System V2 kit (Nugen, AC Leek, The Netherlands) following the manufacturer's instructions. In addition, the SPIA cDNA was subjected to a QC check to assess quality (Agilent 2100 Bioanalyzer) and quantity (Nanodrop ND-1000 Spectrophotometer) in preparation for the next stage. The SPIA cDNA was fragmented and biotin-labelled using the Encore Biotin Module (Nugen) according to the manufacturer's instructions. The fragmented and biotin-labelled cDNA was subjected to a further round of QC checks to assess fragmentation size (Agilent 2100 Bioanalyzer). Hybridisation cocktails were prepared from the fragmented labelled-cDNA according to Nugen's recommendations and hybridised to the microarrays at 45°C overnight. The arrays were washed and stained using the wash protocol FS450\_0001 recommended for Affymetrix Human Transcriptome 2.0 Arrays on the GeneChip Fluidics 450 station. Ultimately, the arrays were scanned using the Affymetrix GeneChip Scanner. CEL files were QC assessed in the Expression Console software package (Affymetrix) by using standard metrics and guidelines for the Affymetrix microarray system. Data was imported and normalised together in Omics Explorer 3.0 (Qlucore, New York, NY, USA), using the Robust Multi-array Average (RMA) sketch algorithm. These microarray data have been submitted to Gene Omnibus and are accessible through accession number GSE85350.

## Gene expression profiling by RNA- sequencing

RNA-sequencing was performed by applying Illumina sequencing by synthesis technology as follows. The amount of RNA for each library (100 ng) was a pool made up of 33 ng of RNA from each of the replicate wells for each sample. The preparation of the library was done by NEBNext Ultra Directional RNA (New England Biolabs, Hitchin, UK) following the manufacturer's protocol. The amplified library was assessed using the Agilent 2100 Bioanalyzer for size and presence of adapter/primers/dimers – sized at ~400bp (including ~130bp adapter). The rRNAs were removed using the rRNA depletion module (New England Biolabs) following the manufacturer's protocol. Libraries were pooled together and sequenced on a HiSeq2500 using a Rapid Run v2 flowcell with on-board clustering in a 2x100 paired-end (PE) configuration. BCL files were processed and deconvoluted using standard techniques. The sequencing output FASTQ files contain the sequences for each read and also a quality score. We have analysed the quality scores and other metrics using



FASTQC (<http://www.bioinformatics.babraham.ac.uk/projects/fastqc/>). Contamination from rRNA was measured using an alignment script (<http://genomespot.blogspot.co.uk/2015/08/screen-for-rna-contamination-in-rna.html>).

Adapter sequences (standard TruSeq LT adapter seq) were removed/trimmed using cutadapt (Martin, 2011). Sequences were then aligned to the genome (hg38 database) using the hierarchical indexing for spliced alignment of transcripts program HISAT2 (Kim *et al.*, 2015). BAM files were imported to Qlucore omics explorer, along with the GTF file for known genes in hg38 (downloaded from UCSC). Qlucore normalises data using a method similar to the trimmed mean of M-values normalization method (TMM), which corrects for transcript length and applies a log transformation (Robinson and Oshlack, 2010) and gives values similar to the quantification of transcript levels in reads per kilobase of exon model per million mapped reads (RPKM) (Robinson and Oshlack, 2010), but also incorporates the TMM normalization factor for an improved between-sample normalization.

A total of 376.6 million raw reads were obtained ( $25.1 \pm 5.4$  million reads per sample). The average value of Q30, representing the probability of an incorrect base call 1 in 1,000 times, was above 96%. The GC content (%GC) of the reads was on average 49%. A total of  $90.92 \pm 6.54\%$  of the clean reads were mapped onto the human reference genome hg38. Among them, an average of  $71.01 \pm 5.82\%$  and  $18.25 \pm 3.79\%$  reads align concordantly exactly one time and more than one time, respectively. These RNA-seq data have been submitted to Gene Omnibus and are accessible through accession number GSE87701.

## ToxCast data mining

We analyzed publically available data from the ToxCast program using the iCSS ToxCast Dashboard (<http://actor.epa.gov/dashboard/>). In the ToxCast program, out of 18 ER assays, 5 measured ERE-mediated transcription and gave results comparable to those of our T47D-Kluc assay. One assay was a single-readout fluorescent protein induction system measuring interaction of ER with ERE at two time points by microscopy technology (OT\_ERa\_EREGFP\_0120 and \_0048). Two other assays were reporter gene assays measuring mRNA in HepG2 cells (ATG\_ERa\_TRANS\_up and ATG\_ERE\_CIS\_up). The last two assays measured reporter protein levels in HEK293T (Tox21\_ERa\_BLA\_Agonist\_ratio) and BG-1 (Tox21\_ERa\_LUC\_BG1\_Agonist) cell lines. Other assays of protein complementation that measure formation of ER dimers and test for activity against ER $\alpha$  (OT\_ER\_ERaERa\_0480 and \_1440). Finally, NVS\_NR\_bER and NVS\_NR\_hER are radioligand receptor binding assays. Not all assays were performed on all bisphenols. For

instance, BPAP was only tested in Attagene assays. In this study, the AC50 value was used as a quantitative measure to reflect the potency of BP alternatives.

#### **Comparison of the microarray and RNA-Seq data to the ER biomarker**

A rank-based nonparametric analysis strategy called the Running Fisher test implemented within the NextBio database (Illumina, San Diego, CA) was used to compare gene lists derived from the microarray and RNA-Seq data to the ER biomarker characterized earlier (Ryan et al, 2016). The Running Fisher test is a normalized ranking approach which enables comparability across data from different studies, platforms, and analysis methods by removing dependence on absolute values of fold-change, and minimizing some of the effects of normalization methods used, while accounting for the level of genome coverage by the different platforms. The Running Fisher algorithm computes statistical significance of similarity between ranked fold-change values of two gene lists using a Fisher exact test (Kupersmidt *et al.*, 2010). A p-value .was selected as our cutoff for significance based on prior evaluation of the cutoff as predictive of activation of ER (Ryan et al., 2016).

#### **Statistical analysis**

The concentration required to elicit a 50% response (AC50) was determined using a nonlinear regression fit using a sigmoid (5-parameters) equation calculated with GraphPad software (GraphPad Software, Inc., La Jolla, CA, USA). For the transcriptome analysis, pairwise comparisons of each tested substance to the negative control were performed using a t-test controlling for batch effects in Omics Explorer 3.0 (Qlucore). Data used for the functional analysis were selected at cut-off p-values < 0.05 with fold-change > 1.2 to study the ER activation signature as previously described (Ryan et al., 2016). Gene and disease ontology were analyzed using the Thomson Reuters MetaCore Analytical Suite version 6.28 recognizing network objects (proteins, protein complexes or groups, peptides, RNA species, compounds among others). The p-values are determined by hypergeometric calculation and adjusted using a Benjamini & Hochberg approach. All experiments were performed 3 times in triplicate (n=3).

# Results

## *E-screen and ERE-luciferase reporter gene assays*

We have studied the estrogenic activities of 7 BP found in foodstuffs and human biological fluids in three human breast cancer cell lines. As an initial investigative step of estrogenic potential, an E-Screen assay was performed using two hormone dependent (MCF-7, T47D) and one hormone independent (MDA-MB-231) human breast cancer cell lines (Figure 2A). The positive control 17 $\beta$ -estradiol was very potent in inducing the proliferation of MCF-7 cells (AC<sub>50</sub> = 8 pM). All BP derivatives were also able to promote cell growth at concentrations 10,000 to 100,000 higher than 17 $\beta$ -estradiol (Figure 2A, top panel). BPAF was the most potent BP (AC<sub>50</sub>=0.03  $\mu$ M) followed by BPZ (0.11  $\mu$ M) > BPB (0.24 $\mu$ M) > BPA (0.36  $\mu$ M) > BPAP (0.39  $\mu$ M) > BPF (0.55  $\mu$ M) > BPS (1.33  $\mu$ M). The same overall trend was observed with the T47-D cell line (Figure 2A, middle panel), albeit to a lesser extent which can be accounted for by the fact that T47-D cells express lower levels of ER. As expected no cell proliferative effects were observed with the hormone independent, ER-negative MDA-MB-231 cell line suggesting that proliferative effects were mediated by ER (Figure 2A, bottom panel).

Since the observed BP-derivative induced proliferation of MCF-7 and T47D cells (Figure 2A and 2B) could be mediated by different hormones, estrogenic effects of BPA alternatives was then investigated employing a luciferase reporter gene assay allowing measurement of ERE-mediated transcription. The results (Figure 2B, upper panel) were very similar to those obtained from the E-Screen assay: BPAF was the most potent bisphenol (AC<sub>50</sub> = 0.08  $\mu$ M) at stimulating ERE-luciferase reporter gene expression followed by BPB (0.3  $\mu$ M) > BPZ (0.4  $\mu$ M) ~ BPA (0.4  $\mu$ M) > BPF (1  $\mu$ M) ~ BPAP (1  $\mu$ M) > BPS (1.5  $\mu$ M) having estrogenic effects in the same range as BPA. Moreover, the addition of ICI 182,780 (100 nM) antagonized the activation of ER by estradiol and bisphenols confirming reporter gene expression via this receptor (Figure 2C). However, estrogenic effects of some BP derivatives, such as BPB and BPZ, were not completely antagonized by 100 nM ICI addition, suggesting estrogenic activation mechanisms independent of ER.

ToxCast data mining (Table 1) confirms our results but also reveals some discrepancy with the results of the ToxCast assays. BPF, BPZ and BPB were classified as inactive in the ToxCast gene reporter ER $\alpha$ \_BLA\_Agonist\_ratio assay, because they did not reach the response threshold, possibly due to the lower sensitivity of this assay. BPF was classified as inactive in the majority of ToxCast assays although it has been found to be positive in the EDSP Tier 1 uterotrophic assay (Judson et al., 2015).

1

## 2 *Transcriptome profiling*

3 MCF-7 cells treated for a period of 48h with BPA, 6 BP alternatives, or 17 $\beta$ -estradiol,  
4 were then subjected to full transcriptome profiling using the Affymetrix microarray platform.  
5 The length of exposure (48h) and the concentration of test agent were selected, because  
6 previous studies showed that these conditions produce robust gene expression changes  
7 (Shioda *et al.*, 2006). Supplementary File 1 shows the statistical significance of differential  
8 transcript cluster expression with respective fold-changes by volcano plots. The set of genes  
9 altered by treatment with BPA and BP alternatives (Supplementary File 2) were highly  
10 enriched in genes involved in the regulation of the cell cycle (Figure 4A), as well as in genes  
11 regulated by steroid hormones (Figure 4B). Additionally, an enrichment analysis of MeSH  
12 terms reveals that exposure to both BPA or the 6 BP alternatives are significantly enriched in  
13 genes involved in the etiology of breast cancer (Figure 4C) such as *ALDH1A3*, *CAMK1D*,  
14 *PPARG* or *PGR*. Genes having the highest fold-changes were similar and indicative of a  
15 hormone-induced proliferative effect (Table 2). The gene encoding the progesterone  
16 receptor (*PGR*) consistently exhibited the highest fold-change after stimulation with BPA or  
17 all the BP alternatives. ER binding motifs were overrepresented in the promoter of the  
18 differentially expressed genes (DEGs). There were 4.8 to 6.4 more ER binding sequences  
19 (EREs) in the promoters of the DEGs than what would be expected by chance (Figure 3D).

20 Statistical values derived from gene ontology analysis can have limited reliability due  
21 to the background set including only the genes that are likely to be expressed in the  
22 experiment (Tipney and Hunter, 2010). Genes disturbed by chance have a higher probability  
23 to be associated with endocrine ontologies in an endocrine sensitive tissue such as the  
24 breast. This could result in an increased false positive rate. In order to circumvent this  
25 problem, we applied a biomarker approach to predict ER modulation. The gene expression  
26 biomarker consists of 46 genes which exhibit consistent expression patterns after exposure  
27 to 7 agonists and three antagonists of ER determined using MCF-7 microarray data derived  
28 from the CMAP 2.0 dataset (Ryan *et al.*, 2016). This gene expression biomarker has a  
29 balanced accuracy for prediction of ER activation of 94%. Gene expression profiles from the  
30 cells treated with BPA and BP alternatives were compared to the ER biomarker using the  
31 Running Fisher algorithm as previously described (Ryan *et al.*, 2016). The cut-off value for  
32 statistical significance was p-value  $\leq 0.0001$  after a Benjamini Hochberg correction of  $\alpha =$   
33 0.001. All transcriptome profile alterations resulting from exposure to BPA and all 6 BP  
34 alternatives (Figure 3E) were highly statistically significant resulting from expression of  
35 biomarker genes in a pattern highly similar to that of the biomarker (Figure 3F).

In order to confirm estrogenic effects provoked by BPA and BP alternatives, RNAs extracted from MCF-7 cells treated with BPAF (0.08  $\mu$ M), BPA (0.36  $\mu$ M) and estradiol (1 nM) were subjected to total transcriptome RNA sequencing (RNA-seq) analysis using the Illumina HiSeq 2500 system. This also allowed us to compare the sensitivity of RNA-seq and microarrays to determine estrogenic effects. We have performed pairwise comparisons to determine the list of DEGs following the same criteria used for the microarray analysis. Only 12-21% of the DEGs identified by RNA-seq were also found to be altered on the microarrays (Figure 4B). The fold changes of these genes found commonly altered in both the microarray and the RNA-seq analysis in comparison to their respective controls were well correlated (Figure 4A) for 17 $\beta$ -estradiol (Pearson  $r = 0.81$ ), BPA ( $r = 0.86$ ) and BPAF ( $r = 0.81$ ). Overall, the RNA-seq method was more sensitive and identified 2-3 times more significantly altered genes compared to the microarray method (Figure 4B). A total of 5091, 2930 and 3093 genes were significantly altered by estradiol, BPA and BPAF, respectively. Genes commonly found altered after the application of both transcriptome profiling methods generally had a higher fold change by the RNA-seq platform (Supplementary File 3). The ontology analysis based on RNA-seq data gave similar results to our previous calculations based on the microarray data and confirms estrogenic effects of BPA and BPAF (Figure 4C). Although more DEGs related to cell cycle function were found by RNA seq than by microarray, the  $-\log_{10}$  p-value for BPA was lower because the total number of DEGs found by RNA seq was higher than by microarray. We similarly applied the ER gene expression biomarker to detect ER agonists after analysis with the Illumina sequencing platform (Figure 4D and 4E). The RNA-seq platform gave results similar to that of Affymetrix microarrays confirming estrogenic effects of BPA alternatives.

## Discussion

Although human populations are exposed to a wide range of BPA alternatives, their estrogenic effects have never been thoroughly determined. We present here the first comprehensive, side-by-side comparison of the estrogenic effects of BPA and 6 BP alternatives (BPZ, BPAF, BPAP, BPB, BPF, BPS) found in foodstuffs and human fluids using both cell proliferation and gene expression profile assays. Our study revealed that the 6 bisphenols introduced in "BPA-free" plastics displayed estrogenic effects with BPAF, BPB and BPZ being more potent than BPA, although their estrogenic potential remained in the same range as BPA. The comparison of transcriptome profiles revealed a signature demonstrating that these effects were mediated via ER (Figure 3). Our results highlight the need to conduct studies to examine possible pathological effects in laboratory animals at

concentrations relevant for human exposures. Similar transcriptome alterations should also be confirmed in other cell lines or primary cells. In addition, combined effects of these bisphenols should be explored in further studies to determine the relevance of these estrogenic effects in terms of human health risk assessment. In particular, our results call for the relevance of human exposure to BPA alternatives in hormone-dependent breast cancer progression to be investigated.

The structure of BPA alternatives (Figure 1) provide insights into the possible mechanisms of action toward ER. BPA binding to ER is mainly driven by van der Waals' forces and hydrogen bond interactions (Li *et al.*, 2015). BPA and 17 $\beta$ -estradiol bind in a similar manner, with two phenol rings pointing to the two ends of the ER hydrophobic pocket. Differences in estrogenic activities between the different BPA alternatives may be due to the different groups present at the bridge between the two phenol rings. Their hydrophobicity is driving their affinity, since the matching of the group carried by the methylene bridge is known to determine binding affinity towards the hydrophobic surface of the ER binding site (Endo *et al.*, 2005). Such a mechanism of ER interaction is supported by the hydrophobicity ranking of bisphenols (logP values BPZ > BPAF > BPAP > BPB > BPA > BPF > BPS), which closely corresponds to their AC50 toxicity score.

Future studies need to explore effects at lower doses, since EDCs can elicit a nonmonotonic response that significantly deviates from the usual sigmoidal curve (Vandenberg *et al.*, 2012). In another transcriptomics study in which MCF-7 cells were exposed to varying concentrations of BPA, a weak gene activation peak at a very low concentration range (~0.1 nM) was observed in addition to the main peak of gene activation (Shioda *et al.*, 2013). Additionally, an investigation of the combinatorial effects of bisphenols would reflect real-world exposure conditions even if estrogenic effects of chemical mixtures *in vitro* are predicted by the use of concentration addition models (Evans *et al.*, 2012).

Our data allows a direct comparison of the sensitivity of RNA-seq and microarray hybridisation in the determination of the transcriptome signature of endocrine disrupting effects. Overall, the application of RNA-seq resulted in the detection of more statistically significant alterations in gene expression than the microarray method. These genes generally had a higher fold change leading to p-values associated with gene expression biomarkers being lower. Overall, RNA sequencing appears to be more sensitive than microarray analysis. This was also the conclusion of studies performed in other cell lines (Perkins *et al.*, 2014), mesenchymal stem cells (Li *et al.*, 2016) and rat tissues (Perkins *et al.*, 2014). In a study of 498 primary neuroblastomas, RNA-seq outperformed microarrays in determining the transcriptomic characteristics of these cancers, while RNA-seq and



1 microarray performed similarly in clinical endpoint prediction (Zhang *et al.*, 2015). Both  
2 technologies are suitable to detect estrogenic effects of BPA alternatives using the gene  
3 expression biomarker of ER $\alpha$  activation. Although the genes weakly expressed were  
4 differently detected by the two platforms, the biomarker signatures were comparable.  
5 However, it is perhaps noteworthy that the microarray processing and analysis pipelines are  
6 better standardized and could thus be more reliable in comparing experiments performed by  
7 different laboratories. Further intra- and inter-experimental comparisons would be necessary  
8 to conclude which method is the most sensitive and reliable to determine transcriptome  
9 signatures.

10 The mechanisms of action resulting in toxic effects from BPA at low levels of  
11 exposure have long remained elusive due to its relatively low affinity to ER. Higher affinities  
12 in the circulating exposure range for BPA have been reported on membrane estrogen  
13 receptor GPR30 / GPER at a concentration of 1 nM (Sheng *et al.*, 2012). BPA is very potent  
14 at inducing rapid non-genomic responses from membrane surface receptors at low  
15 concentrations (1-100 pM) (Wozniak *et al.*, 2005). For example, BPA administration inhibited  
16 meiotic maturation of Zebrafish oocytes through a G protein-coupled ER-dependent  
17 epidermal growth factor receptor pathway (Fitzgerald *et al.*, 2015). BPA can also induce  
18 adipogenesis through other receptors such as peroxisome proliferator-activated receptor  
19 gamma (PPAR $\gamma$ ) (Ahmed and Atlas, 2016). Surprisingly, this latest study provided evidence  
20 that BPS is a more potent adipogen than BPA in inducing 3T3-L1 adipocyte differentiation  
21 and lipid accumulation. Overall, effects of BPA alternatives have been poorly investigated.  
22 Recent studies have revealed that less studied endocrine-related systems such as  
23 glucocorticoid, PPAR, monoamine, noradrenaline and serotonin pathways could be targets  
24 of endocrine disruption (Filer *et al.*, 2014).

25 In adult humans, BPA is considered to be rapidly metabolized by the liver, with  
26 elimination virtually complete within 24 h of exposure, although chronic exposures could  
27 result in accumulation if BPA distributes within tissues that slowly release BPA (Stahlhut *et al.*, 2009). In an investigation of concentrations of BPA metabolites in the urine of 112  
28 pregnant women (ethnically and racially diverse), total BPA consisted of 71% BPA  
29 glucuronide, 15% BPA sulfate and 14% unconjugated BPA (Gerona *et al.*, 2016). These  
30 metabolites have long been believed to be biologically inactive because they are not thought  
31 to be ER agonists. However, this does not preclude effects on other receptor systems or the  
32 creation of equilibrium between the metabolite and the parent if the metabolite is long-lived.  
33 For instance, a recent study showed that BPA glucuronide can induce lipid accumulation and  
34 differentiation of pre-adipocytes (Boucher *et al.*, 2015). Metabolites of the main BPA  
35 alternatives have not been routinely measured in human biomonitoring studies, which may  
36

greatly underestimate real world exposures. Moreover, BPA metabolites may be deconjugated by  $\beta$ -glucuronidase, which is particularly active in the placenta and fetal liver resulting in increased fetal exposure (Ginsberg and Rice, 2009). Overall, the assessment of potential health effects arising from exposure to bisphenols would be greatly facilitated if biomonitoring studies examining reference populations like those of the U.S. CDC's NHANES programme, were to begin routine examination of human fluids for BPA alternatives as well as their metabolites.

Even though disruption of ER function is one of the most investigated endocrine-related targets in the ToxCast data (18 assays) (Judson et al., 2015), our analysis of the high throughput system (HTS) employed has revealed discrepancies between our results and those of this screen with some of these ToxCast assays failing to detect estrogenic effects (Table 1). This was especially the case for BPF which was found negative in 9 out of the 11 assays scrutinized. The two systems of analysis detecting the estrogenic capability of BPF were the Attagene assays. BPF was found to be less potent in these assays than in the present study (Table 1). Our results are in agreement with previously published estrogenic effects of BPF reporting an EC<sub>50</sub> of 0.82  $\mu$ M in a ER luciferase assay (Rosenmai et al., 2014). BPAP on the other hand was found to be more potent in the ToxCast assays, although the difference within the 2 current assays was minimal and could be explained by different grades of chemical purity. Another reason for these differences could be the different sensitivities of HTS assays. These are frequently based on heterologous expression of reporter genes in non-hormone-responsive cell lines that possibly do not possess all the co-factors necessary to transduce the hormone signal, thus resulting in a decreased sensitivity to detect relevant signals.

The US EPA has proposed to substitute the Endocrine Disruptor Screening Program Tier 1 assays with in vitro data in order to reduce the cost and time of toxicity testing, as well as animal use (Browne *et al.*, 2015). One way forward to comply with these objectives would be to integrate gene expression profiling into the HTS system. Transcriptome profiles resulting from exposure to a given chemical could be correlated to signatures of a wide range of chemicals using the Library of Integrated Network-based Cellular Signatures (LINCS) database, which contains signatures from around 4000 chemicals screened in approximately 17 cell lines (<http://www.lincsproject.org>). This could be used as a "Tier 0" assay to further prioritize targeted *in vitro* testing in the context of toxicity testing programmes (Ryan et al., 2016).



# 1 **Conclusion**

2           We have detected estrogenic effects of BPA alternatives by the application of a gene  
3 expression biomarker of ER $\alpha$  activation, whose results are corroborated by functional  
4 cellular assays. Our comparison of microarray and RNA-Seq technologies showed that both  
5 platforms are suitable for the use of this ER $\alpha$  gene expression biomarker.

6           Recently, the plastics manufacturing industry have turned to alternative bisphenols to  
7 produce their “BPA-free” products, often with little toxicology testing. Our data show that  
8 some of these BPA alternatives are even more potent ER activators than BPA, suggesting  
9 that “bisphenol-free” labels on consumer products may need to be more informative.

10

1

## 2 References

- 3 Ahmed, S., and Atlas, E. (2016). Bisphenol S- and bisphenol A-induced adipogenesis of  
4 murine preadipocytes occurs through direct peroxisome proliferator-activated receptor  
5 gamma activation. *Int J Obes (Lond)* **40**(10), 1566-1573.  
6
- 7 Asimakopoulos, A. G., Xue, J., De Carvalho, B. P., Iyer, A., Abualnaja, K. O., Yaghmoor, S.  
8 S., Kumosani, T. A., and Kannan, K. (2016). Urinary biomarkers of exposure to 57  
9 xenobiotics and its association with oxidative stress in a population in Jeddah, Saudi Arabia.  
10 *Environ Res* **150**, 573-81  
11
- 12 Boucher, J. G., Boudreau, A., Ahmed, S., and Atlas, E. (2015). In Vitro Effects of Bisphenol  
13 A beta-D-Glucuronide (BPA-G) on Adipogenesis in Human and Murine Preadipocytes.  
14 *Environ Health Perspect* **123**(12), 1287-93.  
15
- 16 Browne, P., Judson, R. S., Casey, W. M., Kleinstreuer, N. C., and Thomas, R. S. (2015).  
17 Screening Chemicals for Estrogen Receptor Bioactivity Using a Computational Model.  
18 *Environ Sci Technol* **49**(14), 8804-14  
19
- 20 Chen, D., Kannan, K., Tan, H., Zheng, Z., Feng, Y. L., Wu, Y., and Widelka, M. (2016).  
21 Bisphenol Analogues Other Than BPA: Environmental Occurrence, Human Exposure, and  
22 Toxicity-A Review. *Environ Sci Technol* **50**(11), 5438-53.  
23
- 24 Dairkee, S. H., Seok, J., Champion, S., Sayeed, A., Mindrinos, M., Xiao, W., Davis, R. W.,  
25 and Goodson, W. H. (2008). Bisphenol A induces a profile of tumor aggressiveness in high-  
26 risk cells from breast cancer patients. *Cancer Res* **68**(7), 2076-80.  
27
- 28 Endo, Y., Yoshimi, T., Ohta, K., Suzuki, T., and Ohta, S. (2005). Potent estrogen receptor  
29 ligands based on bisphenols with a globular hydrophobic core. *J Med Chem* **48**(12), 3941-4  
30
- 31 Evans, R. M., Scholze, M., and Kortenkamp, A. (2012). Additive Mixture Effects of  
32 Estrogenic Chemicals in Human Cell-Based Assays Can Be Influenced by Inclusion of  
33 Chemicals with Differing Effect Profiles. *PLoS ONE* **7**(8), e43606  
34
- 35 Filer, D., Patisaul, H. B., Schug, T., Reif, D., and Thayer, K. (2014). Test driving ToxCast:  
36 endocrine profiling for 1858 chemicals included in phase II. *Current Opinion in*  
37 *Pharmacology* **19**, 145-152  
38
- 39 Fitzgerald, A. C., Peyton, C., Dong, J., and Thomas, P. (2015). Bisphenol A and Related  
40 Alkylphenols Exert Nongenomic Estrogenic Actions Through a G Protein-Coupled Estrogen  
41 Receptor 1 (Gper)/Epidermal Growth Factor Receptor (Egfr) Pathway to Inhibit Meiotic  
42 Maturation of Zebrafish Oocytes. *Biol Reprod* **93**(6), 135.  
43
- 44 Gerona, R. R., Pan, J., Zota, A. R., Schwartz, J. M., Friesen, M., Taylor, J. A., Hunt, P. A.,  
45 and Woodruff, T. J. (2016). Direct measurement of Bisphenol A (BPA), BPA glucuronide and  
46 BPA sulfate in a diverse and low-income population of pregnant women reveals high  
47 exposure, with potential implications for previous exposure estimates: a cross-sectional  
48 study. *Environ Health* **15**, 50.  
49
- 50 Ginsberg, G., and Rice, D. C. (2009). Does rapid metabolism ensure negligible risk from  
51 bisphenol A? *Environ Health Perspect* **117**(11), 1639-43

- 1 Green, K. A., and Carroll, J. S. (2007). Oestrogen-receptor-mediated transcription and the  
2 influence of co-factors and chromatin state. *Nat Rev Cancer* **7**(9), 713-22
- 3
- 4 Hormann, A. M., Vom Saal, F. S., Nagel, S. C., Stahlhut, R. W., Moyer, C. L., Ellersieck, M.  
5 R., Welshons, W. V., Toutain, P. L., and Taylor, J. A. (2014). Holding thermal receipt paper  
6 and eating food after using hand sanitizer results in high serum bioactive and urine total  
7 levels of bisphenol A (BPA). *PLoS One* **9**(10), e110509
- 8
- 9 Iorio, F., Bosotti, R., Scacheri, E., Belcastro, V., Mithbaokar, P., Ferriero, R., Murino, L.,  
10 Tagliaferri, R., Brunetti-Pierri, N., Isacchi, A., and di Bernardo, D. (2010). Discovery of drug  
11 mode of action and drug repositioning from transcriptional responses. *Proc Natl Acad Sci U*  
12 *S A* **107**(33), 14621-6
- 13
- 14 Judson, R. S., Magpantay, F. M., Chickarmane, V., Haskell, C., Tania, N., Taylor, J., Xia, M.,  
15 Huang, R., Rotroff, D. M., Filer, D. L., Houck, K. A., Martin, M. T., Sipes, N., Richard, A. M.,  
16 Mansouri, K., Setzer, R. W., Knudsen, T. B., Crofton, K. M., and Thomas, R. S. (2015).  
17 Integrated Model of Chemical Perturbations of a Biological Pathway Using 18 In Vitro High-  
18 Throughput Screening Assays for the Estrogen Receptor. *Toxicol Sci* **148**(1), 137-54
- 19
- 20 Kim, D., Langmead, B., and Salzberg, S. L. (2015). HISAT: a fast spliced aligner with low  
21 memory requirements. *Nature methods* **12**(4), 357-60
- 22
- 23 Kitamura, S., Suzuki, T., Sanoh, S., Kohta, R., Jinno, N., Sugihara, K., Yoshihara, S.,  
24 Fujimoto, N., Watanabe, H., and Ohta, S. (2005). Comparative study of the endocrine-  
25 disrupting activity of bisphenol A and 19 related compounds. *Toxicol Sci* **84**(2), 249-59
- 26
- 27 Kupersmidt, I., Su, Q. J., Grewal, A., Sundaresh, S., Halperin, I., Flynn, J., Shekar, M.,  
28 Wang, H., Park, J., Cui, W., Wall, G. D., Wisotzkey, R., Alag, S., Akhtari, S., and Ronaghi,  
29 M. (2010). Ontology-based meta-analysis of global collections of high-throughput public  
30 data. *PLoS One* **5**(9), 10.1371/journal.pone.0013066.
- 31
- 32 Li, J., Hou, R., Niu, X., Liu, R., Wang, Q., Wang, C., Li, X., Hao, Z., Yin, G., and Zhang, K.  
33 (2016). Comparison of microarray and RNA-Seq analysis of mRNA expression in dermal  
34 mesenchymal stem cells. *Biotechnology letters* **38**(1), 33-41
- 35
- 36 Li, L., Wang, Q., Zhang, Y., Niu, Y., Yao, X., and Liu, H. (2015). The Molecular Mechanism  
37 of Bisphenol A (BPA) as an Endocrine Disruptor by Interacting with Nuclear Receptors:  
38 Insights from Molecular Dynamics (MD) Simulations. *PLoS ONE* **10**(3), e0120330
- 39
- 40 Liao, C., and Kannan, K. (2013). Concentrations and profiles of bisphenol A and other  
41 bisphenol analogues in foodstuffs from the United States and their implications for human  
42 exposure. *J Agric Food Chem* **61**(19), 4655-62
- 43
- 44 Liao, C., Liu, F., and Kannan, K. (2012). Bisphenol s, a new bisphenol analogue, in paper  
45 products and currency bills and its association with bisphenol a residues. *Environ Sci*  
46 *Technol* **46**(12), 6515-22
- 47
- 48 Mandrup, K., Boberg, J., Isling, L. K., Christiansen, S., and Hass, U. (2016). Low-dose  
49 effects of bisphenol A on mammary gland development in rats. *Andrology* **4**(4), 673-83
- 50
- 51 Martin, M. (2011). Cutadapt removes adapter sequences from high-throughput sequencing  
52 reads. *2011* **17**(1)
- 53 Nakao, T., Akiyama, E., Kakutani, H., Mizuno, A., Aozasa, O., Akai, Y., and Ohta, S. (2015).  
54 Levels of tetrabromobisphenol A, tribromobisphenol A, dibromobisphenol A,

1 monobromobisphenol A, and bisphenol a in Japanese breast milk. *Chem Res Toxicol* **28**(4),  
2 722-8

3 Perkins, J. R., Antunes-Martins, A., Calvo, M., Grist, J., Rust, W., Schmid, R., Hildebrandt,  
4 T., Kohl, M., Orengo, C., McMahon, S. B., and Bennett, D. L. H. (2014). A comparison of  
5 RNA-seq and exon arrays for whole genome transcription profiling of the L5 spinal nerve  
6 transection model of neuropathic pain in the rat. *Molecular Pain* **10**, 7-7, 10.1186/1744-8069-  
7 10-7.

8 Rhodes, D. R., and Chinnaiyan, A. M. (2005). Integrative analysis of the cancer  
9 transcriptome. *Nat Genet* **37** Suppl, S31-7

10 Robinson, M. D., and Oshlack, A. (2010). A scaling normalization method for differential  
11 expression analysis of RNA-seq data. *Genome Biol* **11**(3), R25

12 Rochester, J. R. (2013). Bisphenol A and human health: a review of the literature. *Reprod*  
13 *Toxicol* **42**, 132-55

14  
15 Rochester, J. R., and Bolden, A. L. (2015). Bisphenol S and F: A Systematic Review and  
16 Comparison of the Hormonal Activity of Bisphenol A Substitutes. *Environ Health Perspect*  
17 **123**(7), 643-50

18  
19 Rosenmai, A. K., Dybdahl, M., Pedersen, M., Alice van Vugt-Lussenburg, B. M., Wedeby,  
20 E. B., Taxvig, C., and Vinggaard, A. M. (2014). Are structural analogues to bisphenol a safe  
21 alternatives? *Toxicol Sci* **139**(1), 35-47

22  
23 Ryan, N., Chorley, B., Tice, R. R., Judson, R., and Corton, J. C. (2016). Moving Toward  
24 Integrating Gene Expression Profiling Into High-Throughput Testing: A Gene Expression  
25 Biomarker Accurately Predicts Estrogen Receptor alpha Modulation in a Microarray  
26 Compendium. *Toxicol Sci* **151**(1), 88-103

27  
28 Sheng ZG1, Huang W, Liu YX, Zhu BZ. (2012) Bisphenol A at a low concentration boosts  
29 mouse spermatogonial cell proliferation by inducing the G protein-coupled receptor 30  
30 expression. *Toxicol Appl Pharmacol*. **267**(1):88-94.

31  
32 Shioda, T., Chesnes, J., Coser, K. R., Zou, L., Hur, J., Dean, K. L., Sonnenschein, C., Soto,  
33 A. M., and Isselbacher, K. J. (2006). Importance of dosage standardization for interpreting  
34 transcriptomal signature profiles: evidence from studies of xenoestrogens. *Proc Natl Acad*  
35 *Sci U S A* **103**(32), 12033-8

36 Shioda, T., Rosenthal, N. F., Coser, K. R., Suto, M., Phatak, M., Medvedovic, M., Carey, V.  
37 J., and Isselbacher, K. J. (2013). Expressomal approach for comprehensive analysis and  
38 visualization of ligand sensitivities of xenoestrogen responsive genes. *Proc Natl Acad Sci U*  
39 *S A* **110**(41), 16508-13

40  
41 Soto, A. M., Sonnenschein, C., Chung, K. L., Fernandez, M. F., Olea, N., and Serrano, F. O.  
42 (1995). The E-SCREEN assay as a tool to identify estrogens: an update on estrogenic  
43 environmental pollutants. *Environ Health Perspect* **103** Suppl 7, 113-22.

44  
45 Stahlhut, R. W., Welshons, W. V., and Swan, S. H. (2009). Bisphenol A data in NHANES  
46 suggest longer than expected half-life, substantial nonfood exposure, or both. *Environ Health*  
47 *Perspect* **117**(5), 784-9

48  
49 Tharp, A. P., Maffini, M. V., Hunt, P. A., VandeVoort, C. A., Sonnenschein, C., and Soto, A.  
50 M. (2012). Bisphenol A alters the development of the rhesus monkey mammary gland. *Proc*  
51 *Natl Acad Sci U S A* **109**(21), 8190-5

Tipney, H., and Hunter, L. (2010). An introduction to effective use of enrichment analysis software. *Hum Genomics* **4**(3), 202-6.

van de Vijver, M. J., He, Y. D., van't Veer, L. J., Dai, H., Hart, A. A., Voskuil, D. W., Schreiber, G. J., Peterse, J. L., Roberts, C., Marton, M. J., Parrish, M., Atsma, D., Witteveen, A., Glas, A., Delahaye, L., van der Velde, T., Bartelink, H., Rodenhuis, S., Rutgers, E. T., Friend, S. H., and Bernards, R. (2002). A gene-expression signature as a predictor of survival in breast cancer. *N Engl J Med* **347**(25), 1999-2009

Vandenberg, L. N., Colborn, T., Hayes, T. B., Heindel, J. J., Jacobs, D. R., Lee, D. H., Shioda, T., Soto, A. M., Vom Saal, F. S., Welshons, W. V., Zoeller, R. T., and Myers, J. P. (2012). Hormones and endocrine-disrupting chemicals: low-dose effects and nonmonotonic dose responses. *Endocr Rev* **33**, 10.1210/er.2011-1050.

Wilson, V. S., Bobseine, K., and Gray, L. E., Jr. (2004). Development and characterization of a cell line that stably expresses an estrogen-responsive luciferase reporter for the detection of estrogen receptor agonist and antagonists. *Toxicol Sci* **81**(1), 69-77

Wozniak, A. L., Bulayeva, N. N., and Watson, C. S. (2005). Xenoestrogens at picomolar to nanomolar concentrations trigger membrane estrogen receptor-alpha-mediated Ca<sup>2+</sup> fluxes and prolactin release in GH3/B6 pituitary tumor cells. *Environ Health Perspect* **113**(4), 431-9

Zhang, W., Yu, Y., Hertwig, F., Thierry-Mieg, J., Zhang, W., Thierry-Mieg, D., Wang, J., Furlanello, C., Devanarayan, V., Cheng, J., Deng, Y., Hero, B., Hong, H., Jia, M., Li, L., Lin, S. M., Nikolsky, Y., Oberthuer, A., Qing, T., Su, Z., Volland, R., Wang, C., Wang, M. D., Ai, J., Albanese, D., Asgharzadeh, S., Avigad, S., Bao, W., Bessarabova, M., Brilliant, M. H., Brors, B., Chierici, M., Chu, T. M., Zhang, J., Grundy, R. G., He, M. M., Hebring, S., Kaufman, H. L., Lababidi, S., Lancashire, L. J., Li, Y., Lu, X. X., Luo, H., Ma, X., Ning, B., Noguera, R., Peifer, M., Phan, J. H., Roels, F., Rosswog, C., Shao, S., Shen, J., Theissen, J., Tonini, G. P., Vandesompele, J., Wu, P. Y., Xiao, W., Xu, J., Xu, W., Xuan, J., Yang, Y., Ye, Z., Dong, Z., Zhang, K. K., Yin, Y., Zhao, C., Zheng, Y., Wolfinger, R. D., Shi, T., Malkas, L. H., Berthold, F., Wang, J., Tong, W., Shi, L., Peng, Z., and Fischer, M. (2015). Comparison of RNA-seq and microarray-based models for clinical endpoint prediction. *Genome Biol* **16**, 133, 10.1186/s13059-015-0694-1.

Zhou, X., Kramer, J. P., Calafat, A. M., and Ye, X. (2014). Automated on-line column-switching high performance liquid chromatography isotope dilution tandem mass spectrometry method for the quantification of bisphenol A, bisphenol F, bisphenol S, and 11 other phenols in urine. *J Chromatogr B Analyt Technol Biomed Life Sci* **944**, 152-6

1 **Table 1. Comparison to ToxCast data.** Publically available data was analysed from the  
2 ToxCast program using the iCSS ToxCast Dashboard. AC50 values ( $\mu\text{M}$ ) for ToxCast  
3 assays relative to ESR1 activation are compared to the results presented here. Negative  
4 results are displayed by grey boxes. White boxes shows assays in which bisphenols have  
5 not been tested.

6

| CASRN     | Name         | ATG_ERa_TRANS_up | ATG_ERE_CIS_up | NVS_NR_bER | NVS_NR_hER | OT_ER_ERaERa_0480 | OT_ER_ERaERa_1440 | OT_ERa_EREGFP_0120 | OT_ERa_EREGFP_0480 | TOX21_ERa_BLA_Agonist_ratio | TOX21_ERa_LUC_BG1_Agonist | AC50 MCF7 this study | AC50 LUC this study |
|-----------|--------------|------------------|----------------|------------|------------|-------------------|-------------------|--------------------|--------------------|-----------------------------|---------------------------|----------------------|---------------------|
| 1478-61-1 | Bisphenol AF | 0.36             | 0.09           | 0.07       | 0.03       | 1.05              | 0.712             | 0.1                | 0.11               | 0.36                        | 0.05                      | 0.03                 | 0.08                |
| 843-55-0  | Bisphenol Z  |                  |                |            |            |                   |                   |                    |                    | ####                        | 0.31                      | 0.11                 | 0.4                 |
| 77-40-7   | Bisphenol B  | 0.13             | 0.17           | 0.21       | 0.27       | 1.82              | 1.41              | 0.18               | 0.22               | ####                        | 0.11                      | 0.24                 | 0.3                 |
| 80-05-7   | Bisphenol A  | 0.12             | 0.1            | 0.42       | 0.23       | 5.73              | 4.33              | 0.42               | 0.63               | 1.01                        | 0.36                      | 0.36                 | 0.4                 |
| 1571-75-1 | Bisphenol AP | 0.12             | 0.29           |            |            |                   |                   |                    |                    |                             |                           | 0.39                 | 1                   |
| 2467-02-9 | Bisphenol F  | 34.9             | 30.3           | ####       | ####       | ####              | ####              | ####               | ####               | ####                        | ####                      | 0.55                 | 1                   |
| 80-09-1   | Bisphenol S  | 0.8              | 1.42           | 17.7       | 5.45       | 43.8              | 56.1              | 59.2               | 26.6               | 9.29                        | 1.87                      | 1.33                 | 1.5                 |

7

8

1

2 **Table 2. List of the 5 most up- or down-regulated genes after treatment with BPA,**  
3 **BPAF or estradiol (E2).** The transcriptome profiling was performed using the Affymetrix  
4 microarray platform.

5

| E2 (10 pM)   |     | E2 (100 pM)  |      | E2 (1 nM)    |      | BPA          |     | BPAF          |     |
|--------------|-----|--------------|------|--------------|------|--------------|-----|---------------|-----|
| ALDH1A3      | 0.4 | ALDH1A3      | 0.2  | ALDH1A3      | 0.2  | SEMA5A       | 0.3 | ALDH1A3       | 0.3 |
| SEMA5A       | 0.4 | PRICKLE2-AS3 | 0.2  | PSCA         | 0.2  | ALDH1A3      | 0.3 | PSCA          | 0.4 |
| PPARG        | 0.5 | SEMA5A       | 0.3  | TFPI         | 0.2  | PSCA         | 0.3 | RP11-706C16.7 | 0.4 |
| PSCA         | 0.5 | PSCA         | 0.3  | PRICKLE2-AS3 | 0.2  | PRICKLE2-AS3 | 0.3 | SEMA5A        | 0.4 |
| IGFBPL1      | 0.5 | EPAS1        | 0.3  | EPAS1        | 0.3  | GABBR2       | 0.3 | EPAS1         | 0.4 |
| AC005534.8   | 2.6 | MYBL1        | 5.5  | AC106875.1   | 6.4  | AC106875.1   | 3.3 | AGR3          | 3.2 |
| MYB          | 3.0 | AC106875.1   | 6.3  | MYBL1        | 6.5  | MYB          | 3.7 | MYB-AS1       | 3.4 |
| AC106875.1   | 3.2 | GREB1        | 7.1  | GREB1        | 7.1  | GREB1        | 3.8 | MGP           | 3.5 |
| GREB1        | 3.7 | PGR          | 10.0 | PGR          | 9.2  | MGP          | 4.2 | MYB           | 4.1 |
| PGR          | 4.6 | MGP          | 12.4 | MGP          | 15.0 | PGR          | 6.2 | PGR           | 5.7 |
| BPB          |     | BPF          |      | BPS          |      | BPZ          |     | BPAP          |     |
| ALDH1A3      | 0.3 | ALDH1A3      | 0.3  | ALDH1A3      | 0.2  | ALDH1A3      | 0.3 | ALDH1A3       | 0.3 |
| GABBR2       | 0.3 | SEMA5A       | 0.3  | PSCA         | 0.3  | TFPI         | 0.3 | SEMA5A        | 0.4 |
| PSCA         | 0.3 | EPAS1        | 0.4  | SEMA5A       | 0.3  | GABBR2       | 0.3 | GABBR2        | 0.4 |
| PRICKLE2-AS3 | 0.4 | PSCA         | 0.4  | TFPI         | 0.3  | PSCA         | 0.4 | TFPI          | 0.4 |
| EPAS1        | 0.4 | HCAR3        | 0.4  | PRICKLE2-AS3 | 0.3  | EPAS1        | 0.4 | EPAS1         | 0.4 |
| AGR3         | 3.3 | MYB          | 3.9  | AC106875.1   | 5.4  | STC1         | 2.8 | STC1          | 3.1 |
| GREB1        | 3.8 | MYB-AS1      | 4.4  | MYB          | 5.7  | ASCL1        | 2.9 | AL121578.2    | 3.1 |
| MYB          | 4.1 | GREB1        | 4.5  | GREB1        | 6.0  | AGR3         | 3.3 | MYB           | 3.8 |
| MGP          | 4.4 | MGP          | 5.0  | MGP          | 7.8  | MYB-AS1      | 3.4 | AGR3          | 3.8 |
| PGR          | 6.8 | PGR          | 6.5  | PGR          | 9.5  | PGR          | 5.8 | PGR           | 5.8 |

6

7

1

## 2 **Figures Legends**

3

4 **Figure 1. Molecular structures of BPA and bisphenol alternatives in comparison to the**  
5 **natural hormone 17 $\beta$ -estradiol.**

6

7 **Figure 2. Bisphenol A alternatives can effectively substitute for estradiol in promoting**  
8 **growth through estrogen receptors of human breast cancer cells. (A)** Proliferative effect  
9 of BPA and bisphenol alternatives on mammary cells in an E-Screen bioassay. After 24h of  
10 steroid hormone starvation cells were treated for 6 days with the test compounds. Numbers  
11 of cells was measured by an MTT colorimetric assay. Results are expressed as proliferative  
12 effect percentage relative to the proliferation of cells under hormone-free conditions. Data  
13 are the mean  $\pm$  SE of three independent experiments, with each performed in triplicate. **(B)**  
14 Bisphenol A alternatives stimulate estrogen response element-mediated transcription. After  
15 24 hours of steroid hormone starvation, T47D-Kluc cells were treated with the test  
16 compounds for 24 hours. Cells were then lysed and subjected to a bioluminescence  
17 luciferase reporter gene assay. **(C)** Luciferase assays of T47D-Kluc cells treated with  
18 bisphenol A alternatives in the absence (black) or presence (red) of ICI 182,780, an estrogen  
19 receptor antagonist. Results show that ICI 182,780 represses ERE-mediated transcription  
20 induced by bisphenol A alternatives.

21

22

23 **Figure 3. Alteration of MCF-7 transcriptome profiles caused by BPA alternatives bear**  
24 **the signature of ER activation.** Transcriptome analysis of MCF-7 cells treated with BPA  
25 and alternative bisphenols reflect cell cycle changes **(A)**, response to hormone **(B)**, as well  
26 as an association to breast cancer **(C)**. The p-values are determined by hypergeometric  
27 calculation and adjusted using a Benjamini & Hochberg approach. Ratios show the total  
28 number of network objects belonging to each term in comparison to those disturbed by the  
29 treatments. The total of network objects (that is, all DEG) recognized by Metacore are  
30 indicated in parentheses **(D)**. Overrepresentation of ER binding motifs in the promoters of  
31 the differentially expressed genes. The analysis conducted with the transcription factor  
32 analysis tool of Metacore. A total of 1262 ER binding sites are found in the 42909 protein-  
33 based objects in the Metacore background list. A, number of targets in the activated dataset  
34 regulated by ESR1; E, expected mean of hypergeometric distribution; p-value calculated



1 using hypergeometric distribution. **(E)** A gene expression biomarker confirms that BPA and  
 2 bisphenol alternatives are ER agonists. Lists of statistically significant genes from MCF-7  
 3 cells treated with BPA and bisphenol alternatives or the natural hormone 17 $\beta$ -estradiol were  
 4 examined against an ER gene expression biomarker signature consisting of 46 genes. The  
 5 heat map shows the expression of genes in the biomarker after exposure to the indicated  
 6 compound. Fold-change values for the ER biomarker are the average across 7 agonist  
 7 treatments. **(F)** Bar plots showing the significance of the correlation by their  $-\log_{10}$  p-values.  
 8 Classification of activation or suppression required  $p < 0.0001$ . The number of genes  
 9 overlapping the ER biomarker is indicated at the top of each bar.

10

11 **Figure 4. Comparison of RNA-seq and microarray platforms in determining endocrine**  
 12 **disrupting effects of BPA and bisphenol alternatives.** RNA extracted from MCF-7 cells  
 13 was subjected to a full transcriptome profiling using the Illumina RNA sequencing or the  
 14 microarray technology under similar conditions. **(A)** Pearson correlation coefficients between  
 15 the RNA-seq and microarray data. The fold changes in gene function having an altered  
 16 expression by the two methods are presented. **(B)** Venn diagrams showing the number of  
 17 genes uniquely or commonly disturbed. **(C)** Gene ontology analysis of terms associated with  
 18 MCF-7 hormone induced proliferation in the transcriptome profiles obtained by RNA-seq or  
 19 microarray analysis. Ratios are showing the total number of network objects belonging to  
 20 each term in comparison to those disturbed by the treatments. The total of network objects  
 21 (that is, all DEG) recognized by Metacore are indicated in parentheses. **(D)** Heat map of  
 22 genes whose expression was statistically significantly altered examined against an ER gene  
 23 expression biomarker. **(E)** Bar plots showing the significance of the correlation by their  $-\log_{10}$  p-values.

25

## 26 **Supplementary files**

27 **Supplementary File 1. Volcano plots of the MCF7 transcriptome profile changes**  
 28 **induced by BPA and bisphenol alternatives.** Alterations in MCF7 transcriptome profiles  
 29 induced by a 48h exposure to three concentrations of 17 $\beta$ -estradiol and the AC(50) of 7  
 30 bisphenols were determined using the Affymetrix GeneChip® Human Transcriptome Array  
 31 2.0. The volcano plots show the log 2 fold changes and the  $-\log_{10}$  p-values in transcript  
 32 cluster expression compared to the negative control. Data selected at the cut off values  $p <$   
 33 0.05 and fold change  $> 1.2$  for the functional analysis were represented by red dots.

34

1 **Supplementary File 2. Alterations of the MCF7 transcriptome induced by BPA and**  
 2 **bisphenol alternatives.** MCF-7 cells were subjected to a full transcriptome profiling using  
 3 the Affymetrix microarray platform. The list of genes having their expression altered by the  
 4 treatment with the BPA alternatives or three concentrations of 17 $\beta$ -estradiol is provided with  
 5 their fold-changes and the p-values. Data were selected at the cut off values  $p < 0.05$  and  
 6 fold change  $> 1.2$ .

7

8 **Supplementary File 3. Alterations of the MCF7 transcriptome induced by BPA, BPAF,**  
 9 **and 17 $\beta$ -estradiol.** MCF-7 cells were subjected to a full transcriptome profiling using the  
 10 Illumina RNA sequencing technology. The list of genes having their expression altered by  
 11 the treatment with BPA, BPAF, or 17 $\beta$ -estradiol is provided with their fold-changes and the  
 12 p-values. Data were selected at the cut off values  $p < 0.05$  and fold change  $> 1.2$ .

13

14

15

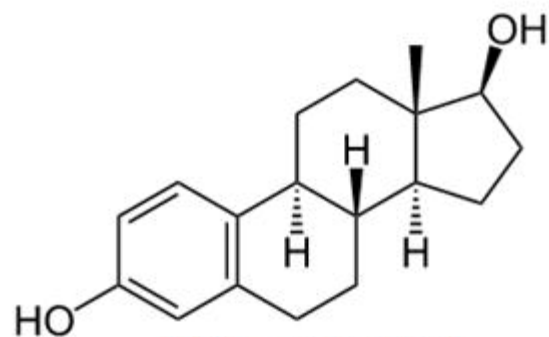

17β-estradiol

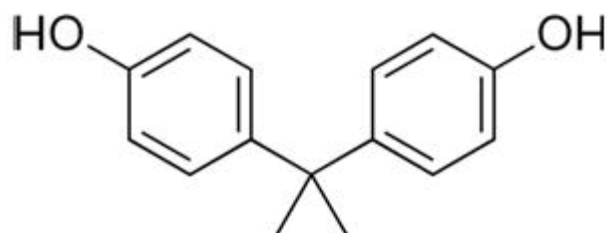

Bisphenol A

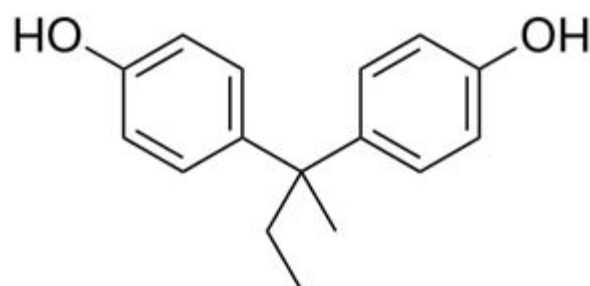

Bisphenol B

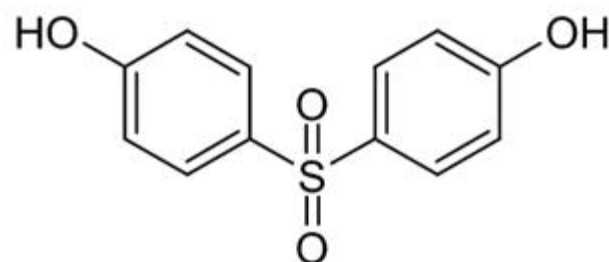

Bisphenol S

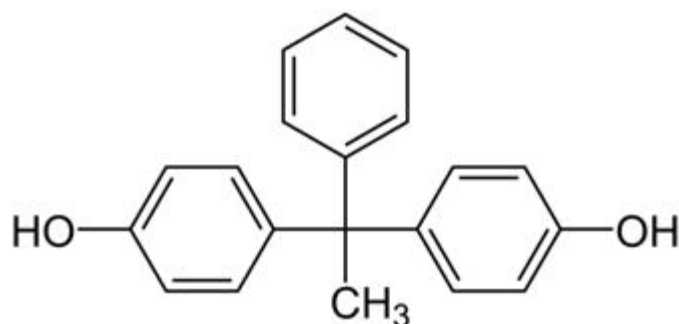

Bisphenol AP

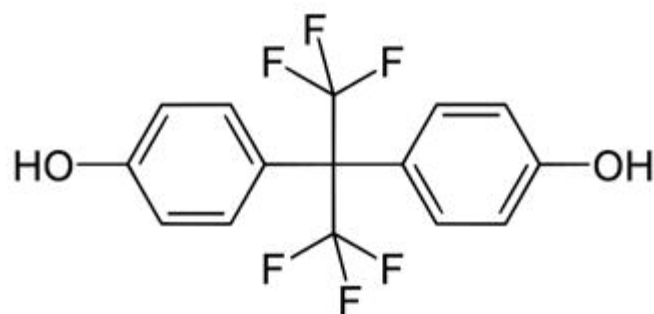

Bisphenol AF

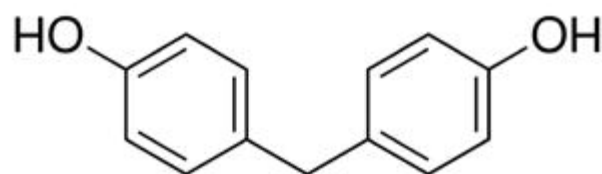

Bisphenol F

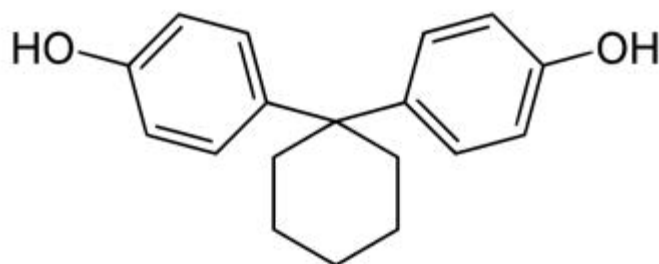

Bisphenol Z

**A**

**MCF-7**

—○— Estradiol —■— BPA —○— BPAF —■— BPAP —□— BPB —●— BPF —▲— BPS —△— BPZ

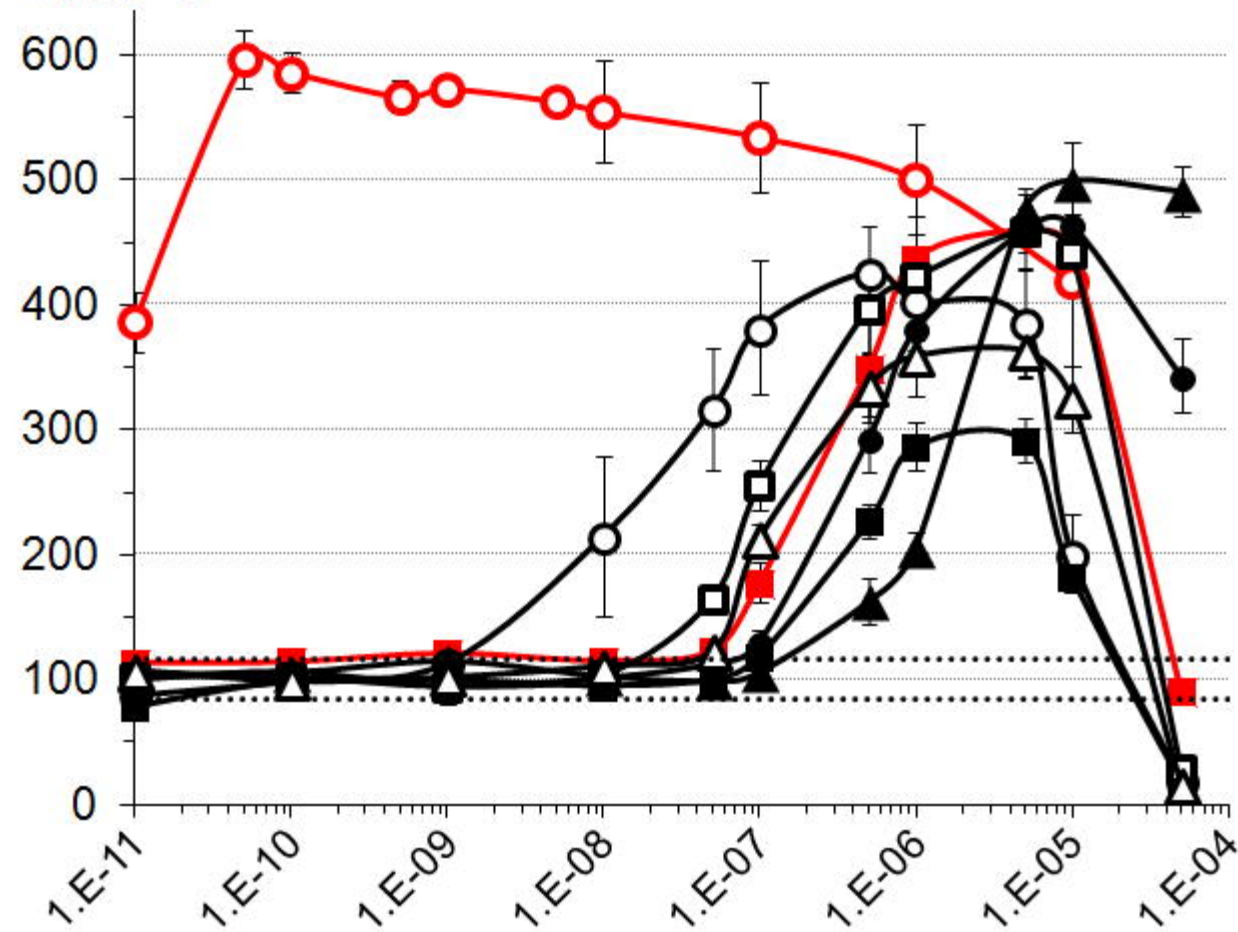

**T47-D**

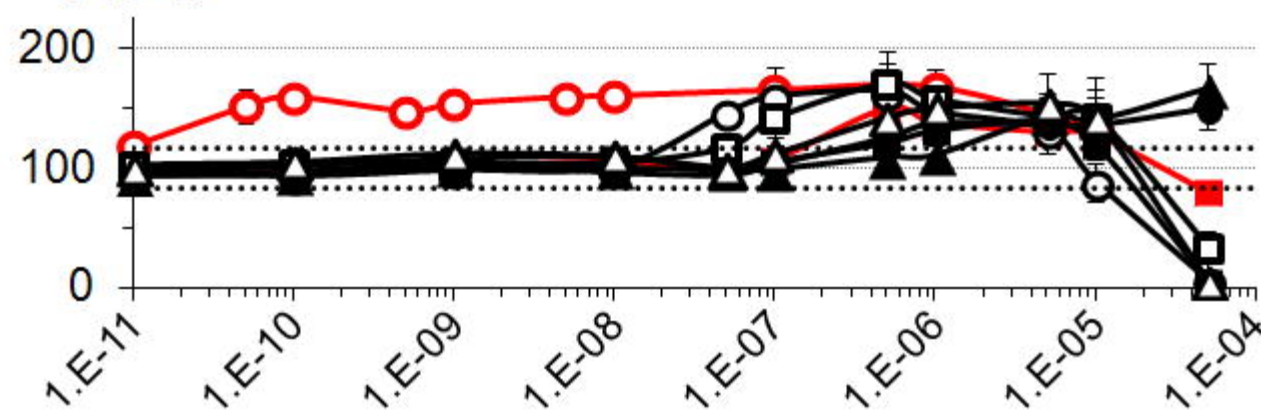

**MDA-MB-231**

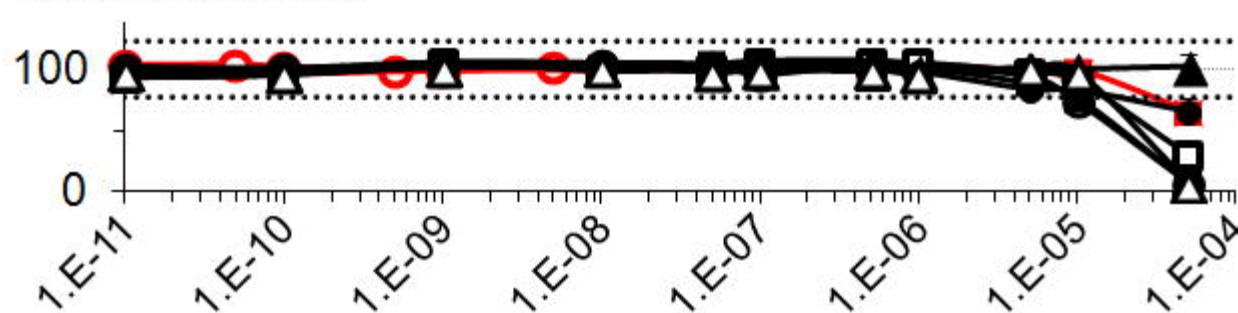

Concentration (log M)

**B T47D-KBluc**

Estrogen Responsive Elements activation (RU)

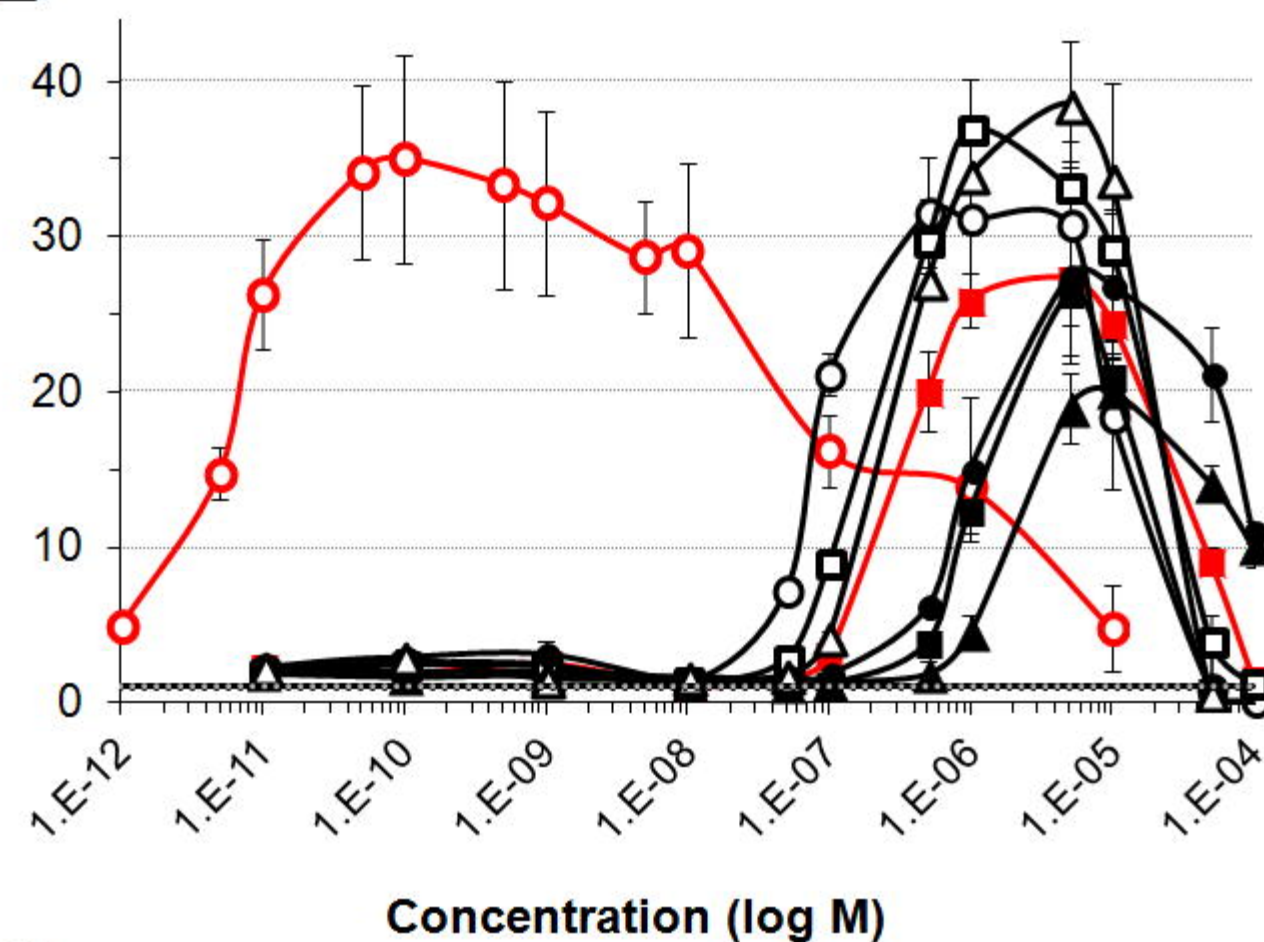

**C**

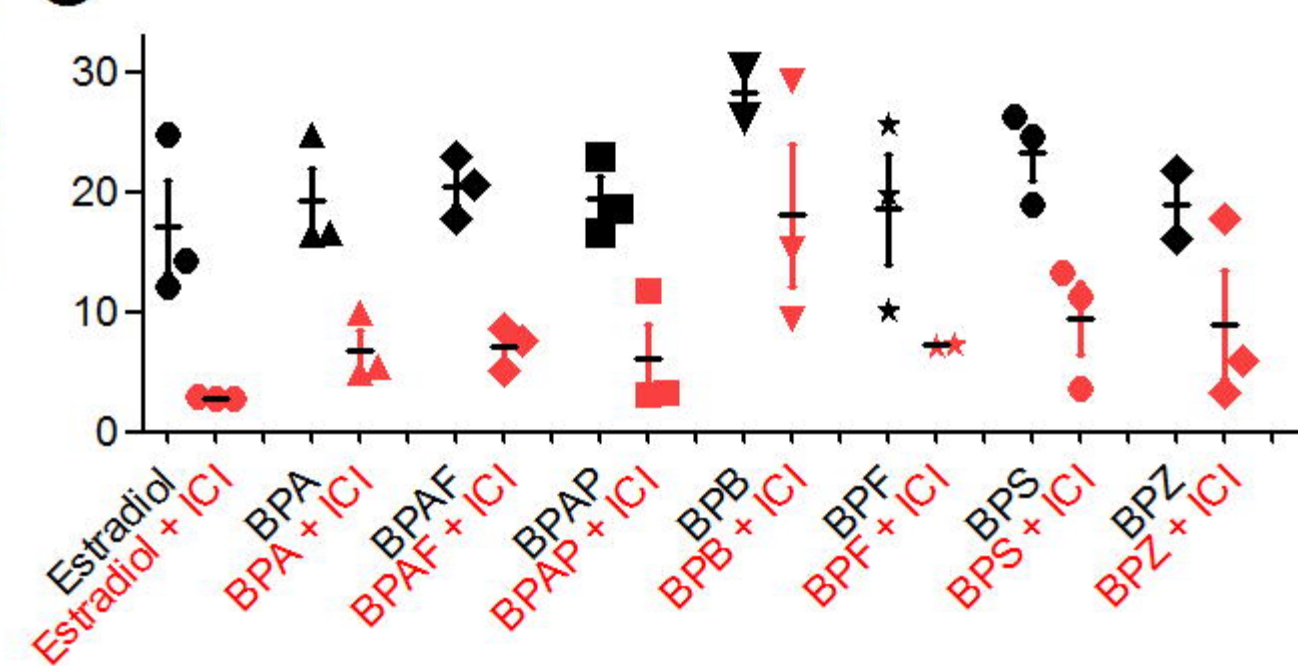



**cell cycle (GO:0007049)**

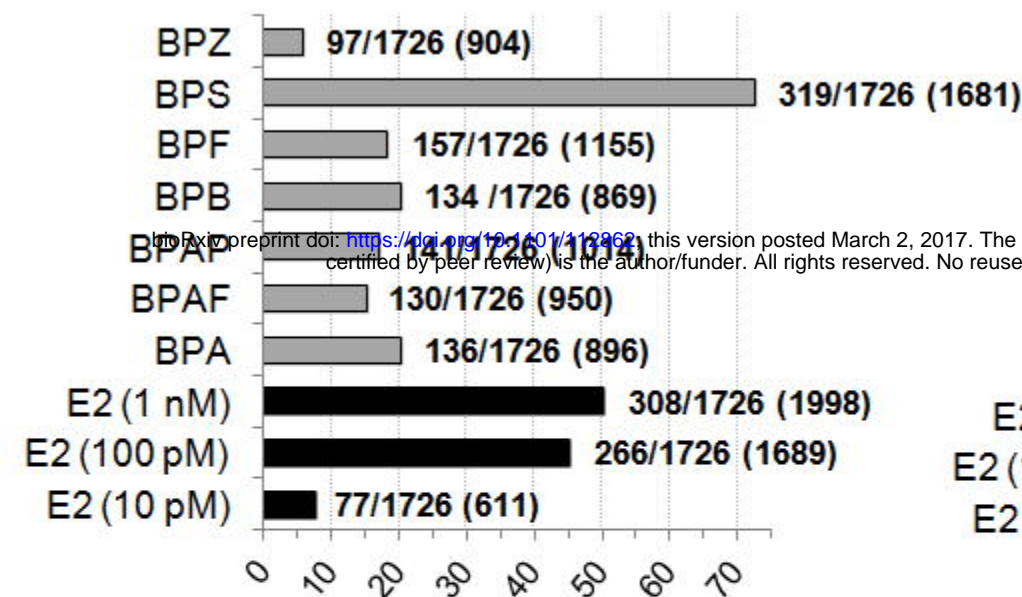

response to steroid hormone  
(GO:0048545)

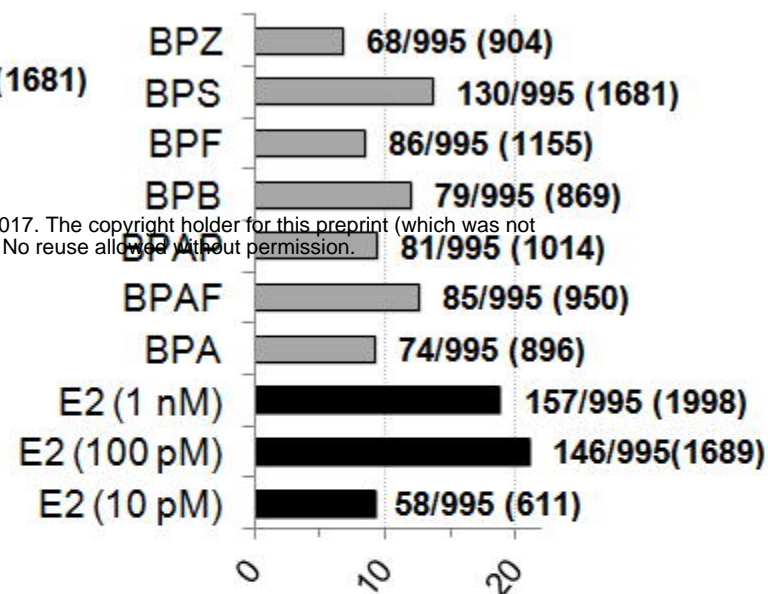

## breast neoplasms (MeSH ID001943)

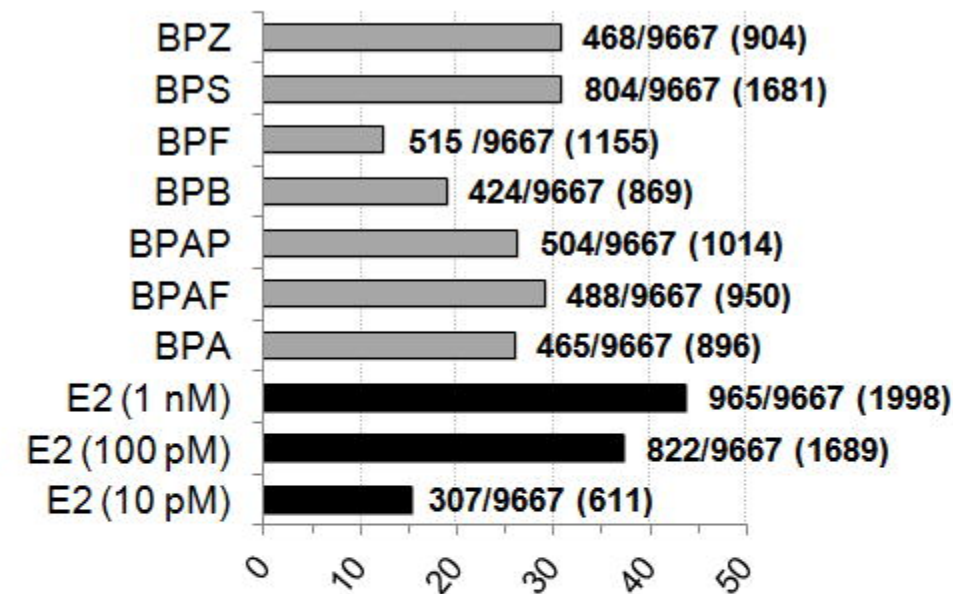

## D

**ESR1 transcription factor binding sites**

|                           | A   | E    | p-value  |
|---------------------------|-----|------|----------|
| <b>Estradiol (10 pM)</b>  | 95  | 16.1 | 8.1e-45  |
| <b>Estradiol (100 pM)</b> | 226 | 44.6 | 4.1e-94  |
| <b>Estradiol (1nM)</b>    | 276 | 52.8 | 7.8e-120 |
| <b>Bisphenol A</b>        | 150 | 23.4 | 4.9e-76  |
| <b>Bisphenol AF</b>       | 134 | 24.6 | 8.3e-59  |
| <b>Bisphenol AP</b>       | 158 | 26.7 | 9.0e-75  |
| <b>Bisphenol B</b>        | 141 | 22.7 | 1.7e-69  |
| <b>Bisphenol F</b>        | 151 | 30   | 1.3e-61  |
| <b>Bisphenol S</b>        | 217 | 44.8 | 2.3e-86  |
| <b>Bisphenol Z</b>        | 124 | 22.8 | 2.3e-54  |

## E

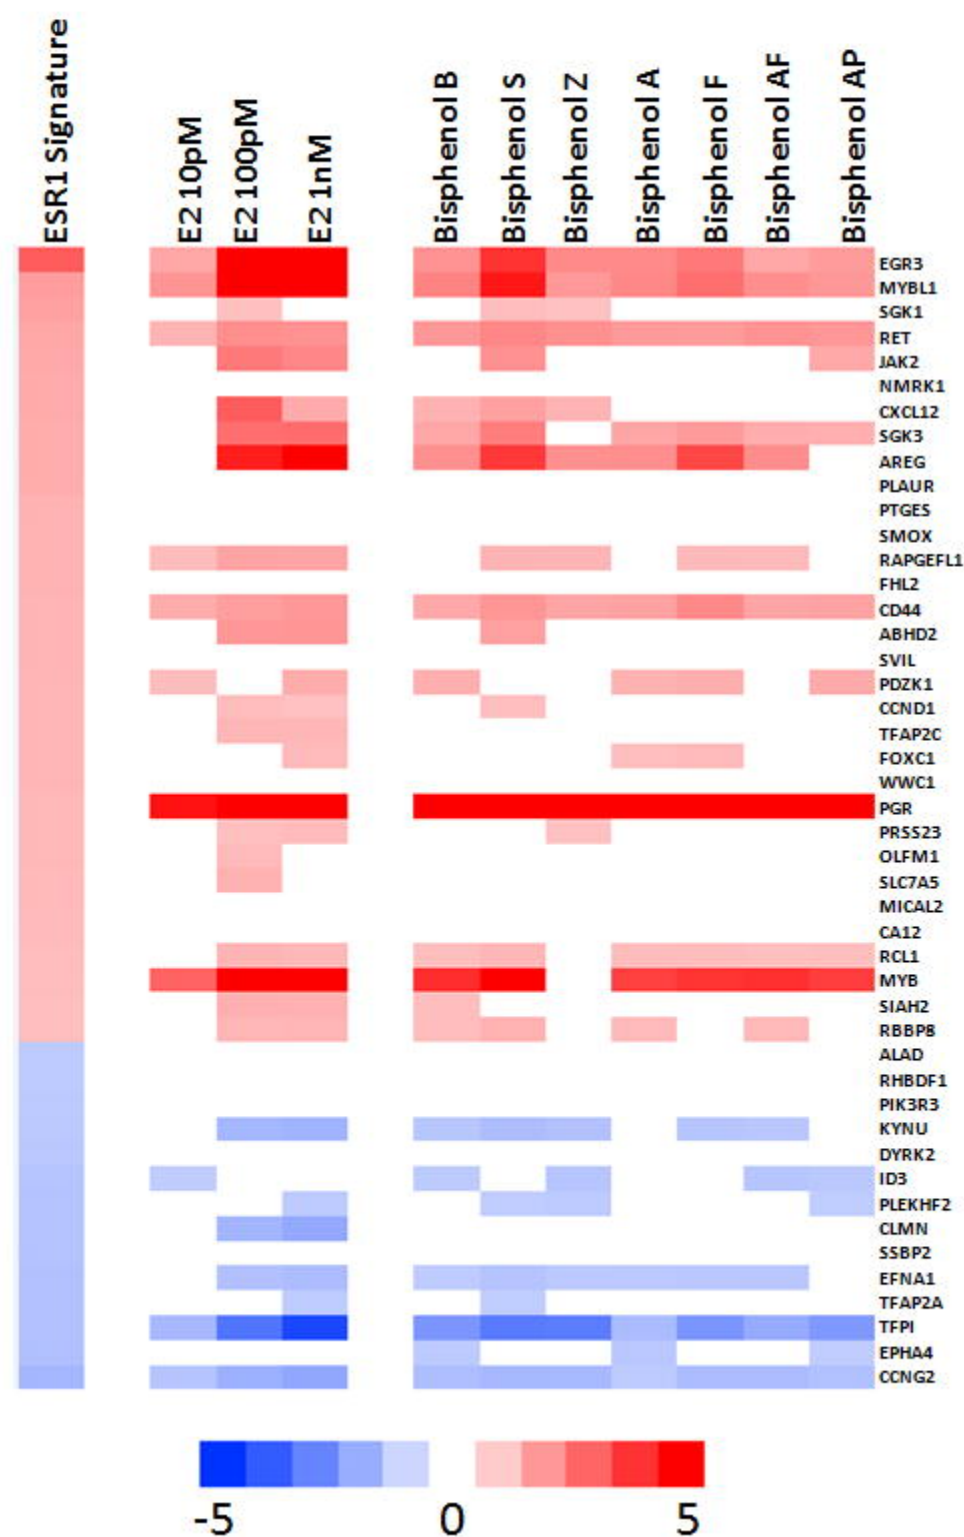**F**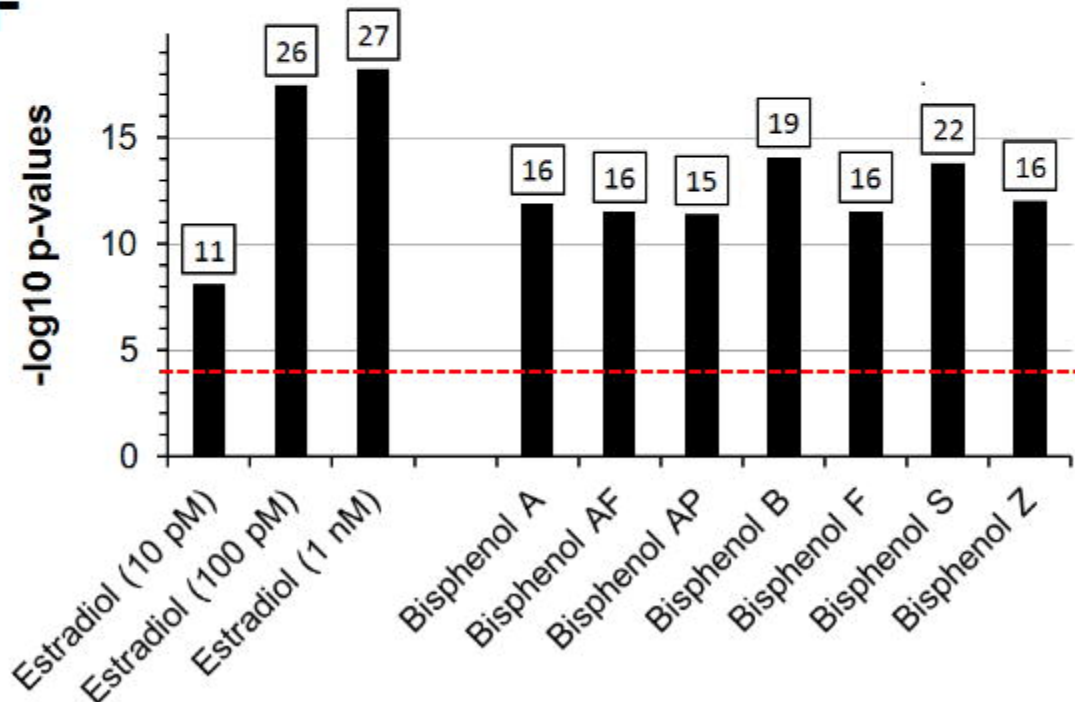



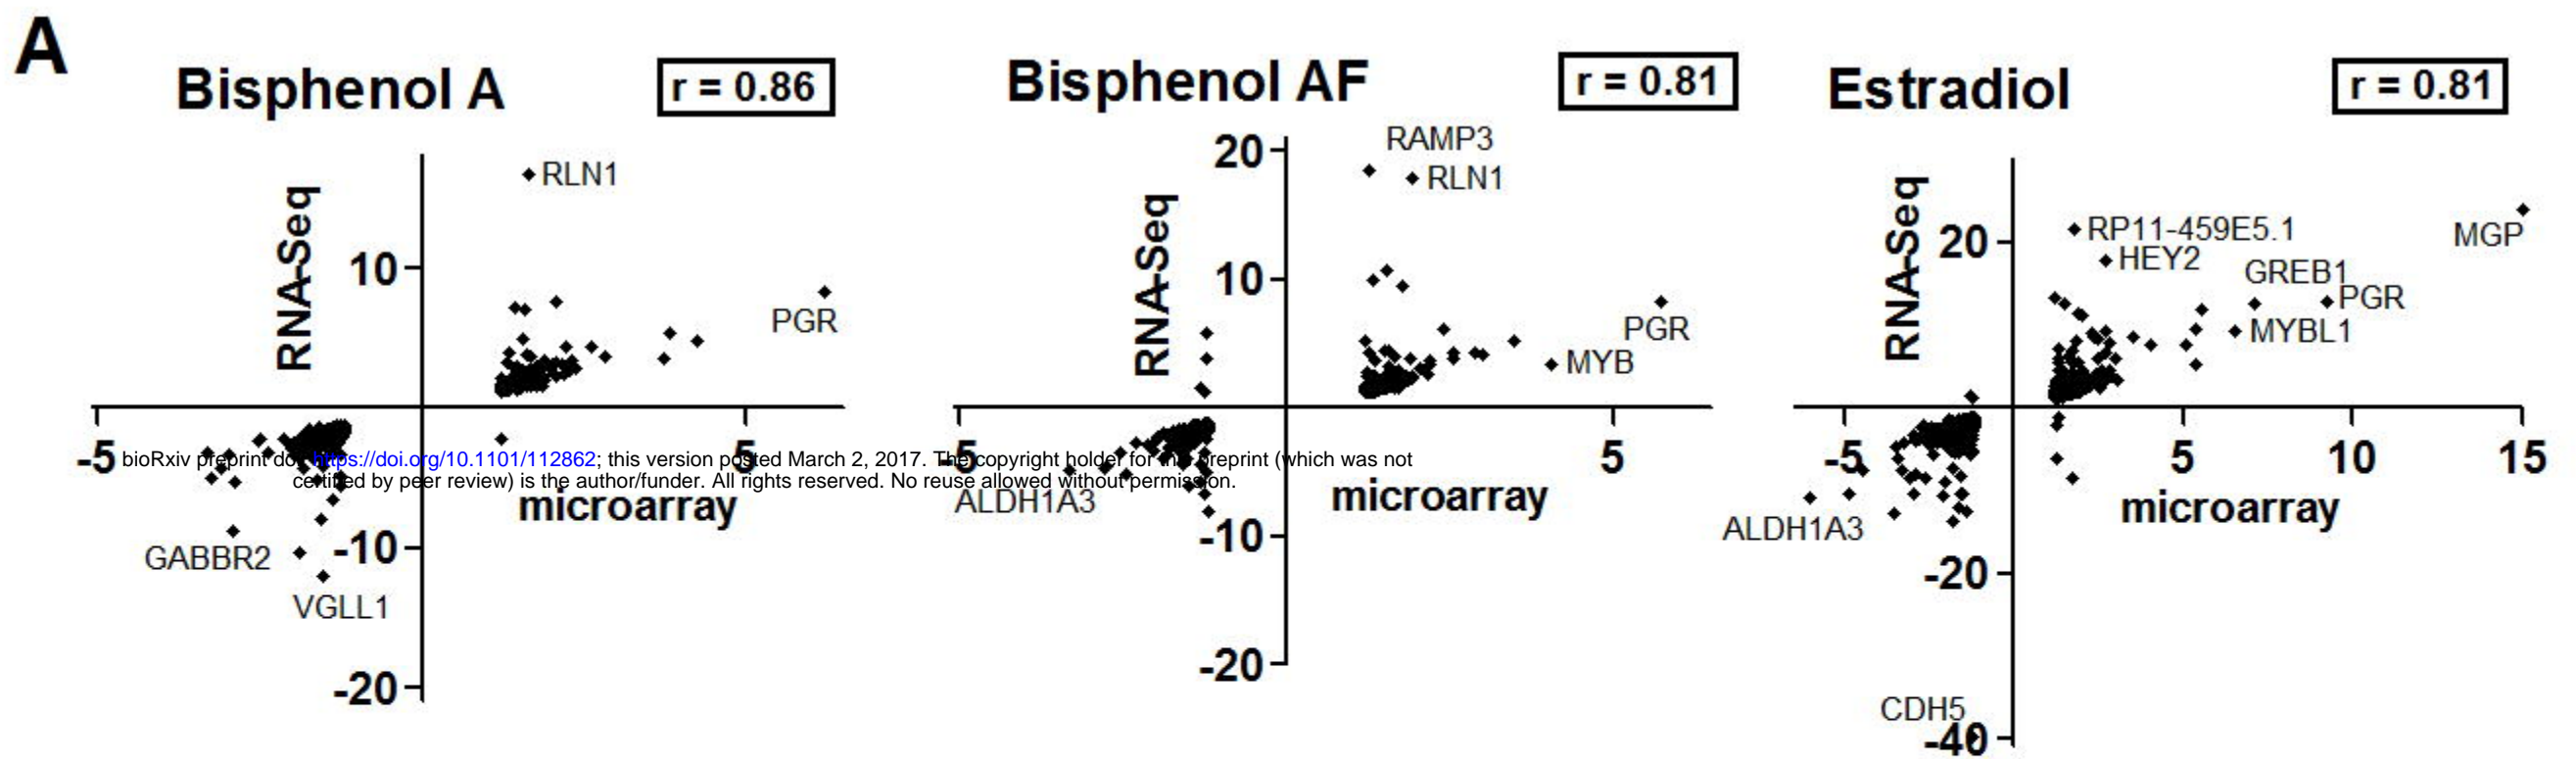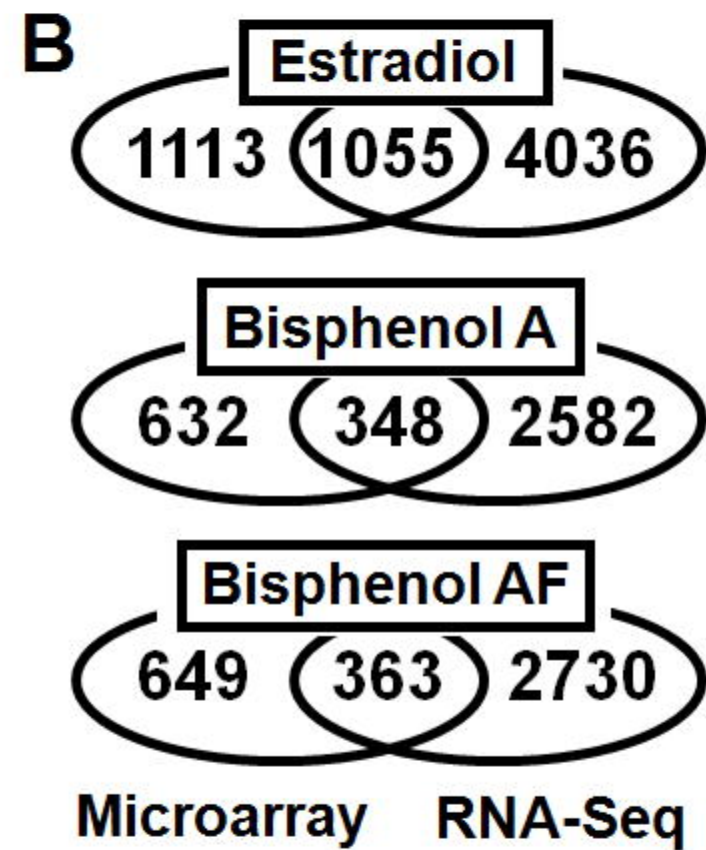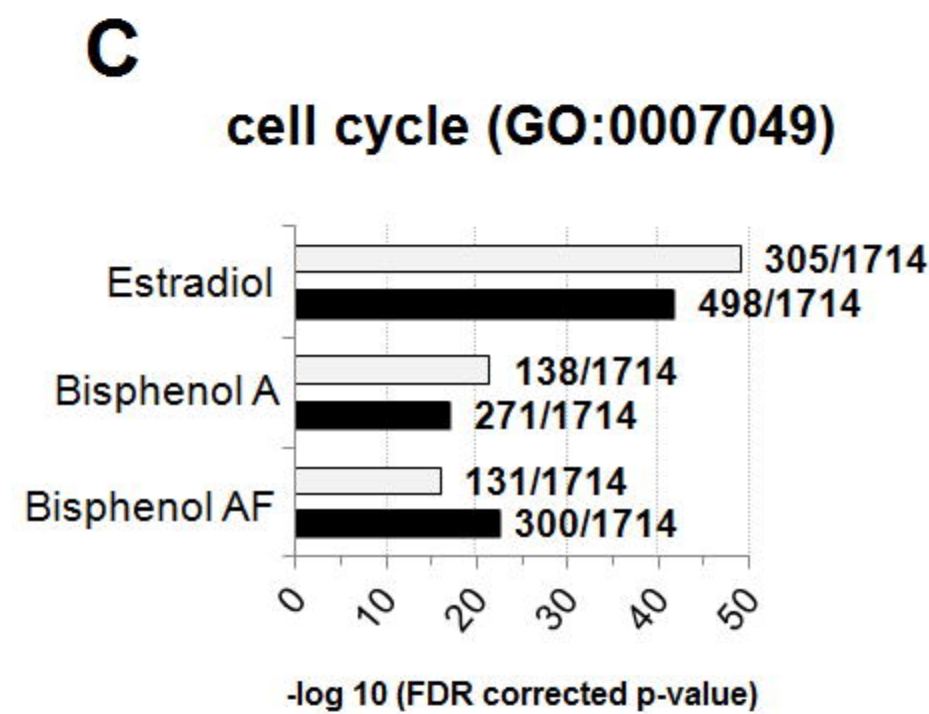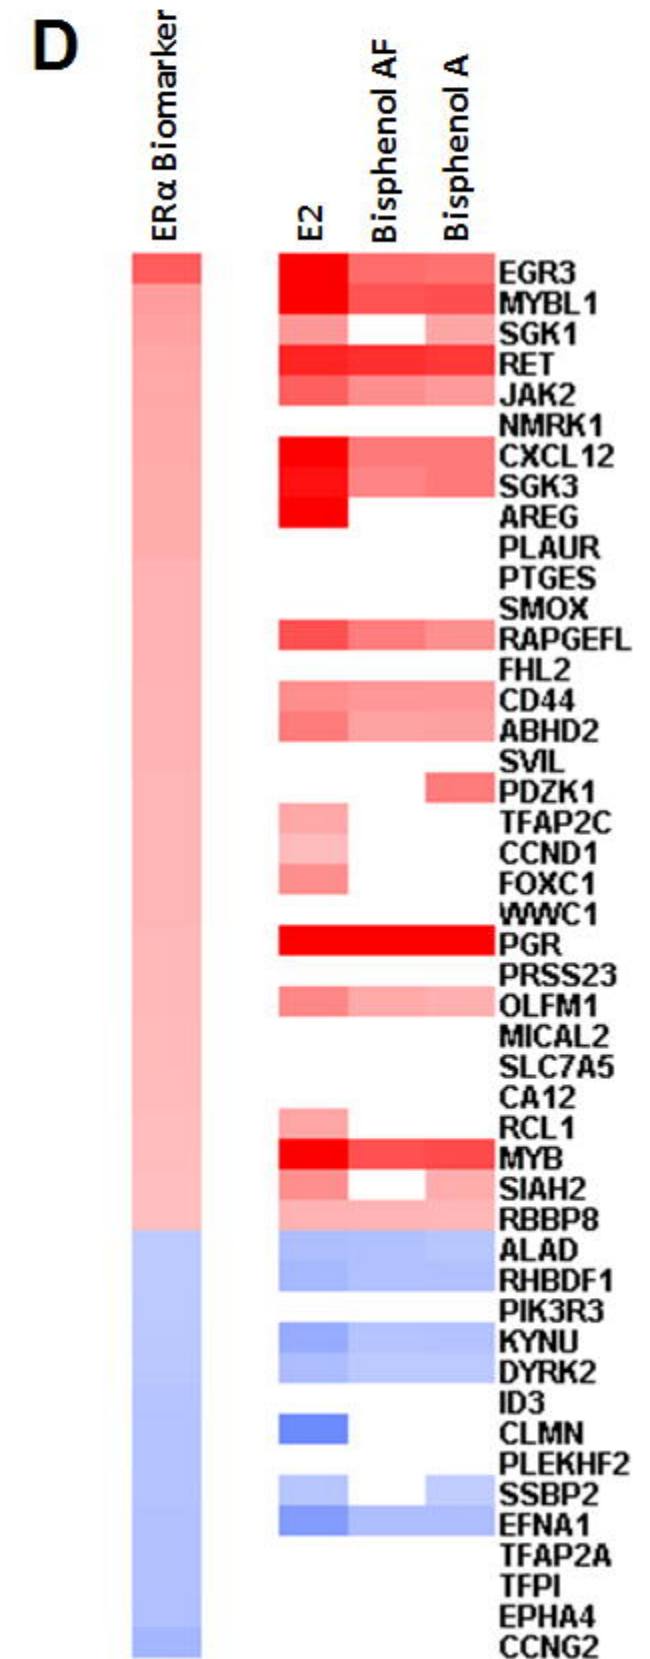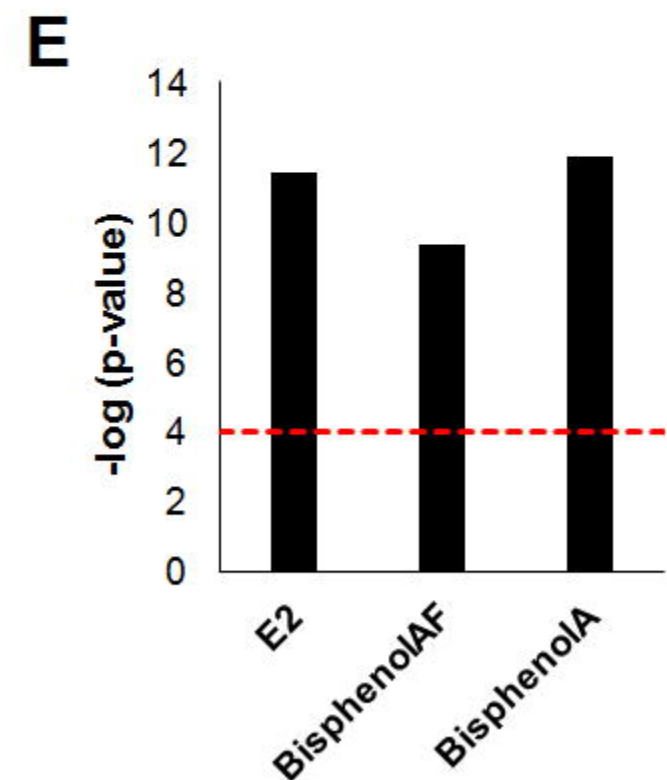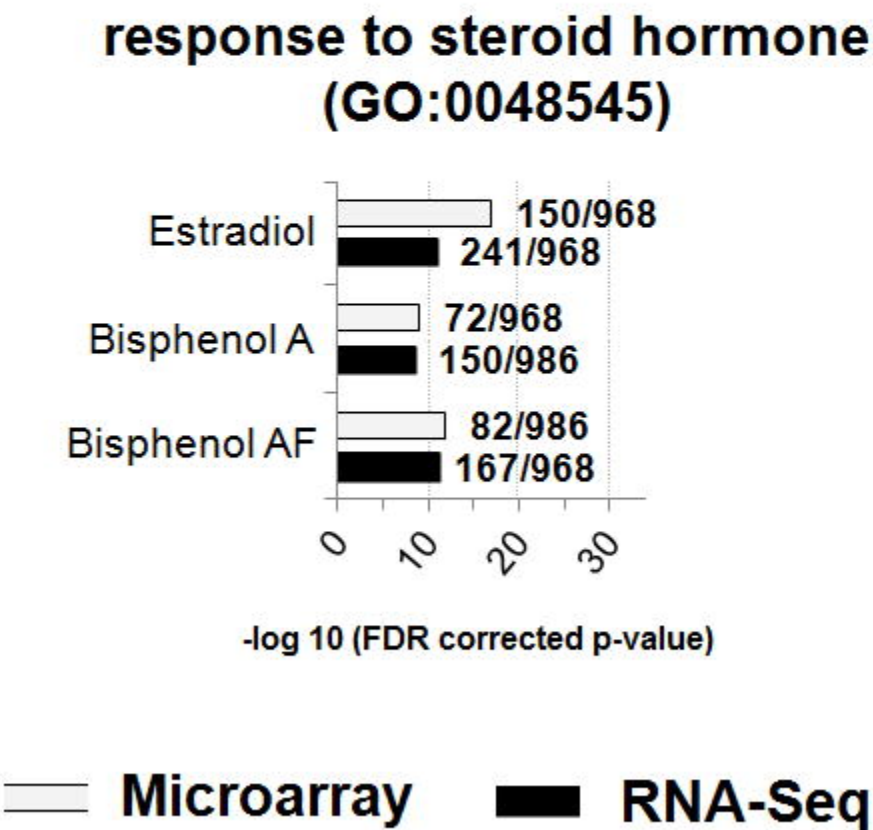

Source: http://biorxiv.org/content/10.1101/112862v1.full.pdf
